# Supplementary material for: Global catchment modelling using World-Wide HYPE (WWH), open data and stepwise parameter estimation
Source: Copernicus journal article supplement (doi:10.5194/hess-2019-111), 2019-04-01
Supplement: Supplementary file [file hess-2019-111-AC3-supplement.pdf]

# Global catchment modelling using World-Wide HYPE (WWH), open data and stepwise parameter estimation

Berit Arheimer<sup>1\*</sup>, Rafael Pimentel<sup>1,2</sup>, Kristina Isberg<sup>1</sup>, Louise Crochemore<sup>1</sup>, Jafet C.M. Andersson<sup>1</sup>, Abdulghani Hasan<sup>1,3</sup>, and Luis Pineda<sup>1,4</sup>

<sup>1</sup>Swedish Meteorological and Hydrological Institute (SMHI), Folkborgsvägen 17, 60176 Norrköping, Sweden.

<sup>2</sup>University of Cordoba, Edif. Leonardo Da Vinci, Campus de Rabanales, 14071, Córdoba, Spain.

<sup>3</sup>Lund University Box 117, SE-221 00, Lund, Sweden.

<sup>4</sup>Proyecto Yachay, Hacienda San José, Urcuquí, Ecuador.

\*Corresponding author: Berit Arheimer ( [berit.arheimer@smhi.se](mailto:berit.arheimer@smhi.se) )

## Abstract

Recent advancements in catchment hydrology (such as understanding hydrological processes, accessing new data sources, and refining methods for parameter constraints) make it possible to apply catchment models for ungauged basins over large domains. Here we present a cutting-edge case study applying catchment-modelling techniques at the global scale for the first time. The modelling procedure was challenging but doable and even the first model version show better performance than traditional gridded global models of river flow. We used the open-source code of the HYPE model and applied it for >130 000 catchments (with an average resolution of 1000 km<sup>2</sup>), delineated to cover the Earth's landmass (except Antarctica). The catchments were characterized using 20 open databases on physiographical variables, to account for spatial and temporal variability of the global freshwater resources, based on exchange with the atmosphere (e.g. precipitation and evapotranspiration) and related budgets in all compartments of the land (e.g. soil, rivers, lakes, glaciers, and floodplains), including water stocks, residence times, interfacial fluxes, and the pathways between various compartments. Global parameter values were estimated using a step-wise approach for groups of parameters regulating specific processes and catchment characteristics in representative gauged catchments. Daily time-series (> 10 years) from 5338 gauges of river flow across the globe were used for model evaluation (half for calibration and half for independent validation), resulting in a median monthly KGE of 0.4. However, the world-wide HYPE (WWH) model shows large variation in model performance, both between geographical domains and between various flow signatures. The model performs best in Eastern USA, Europe, South-East Asia, and Japan, as well as in parts of Russia, Canada, and South America. The model shows overall good potential to capture flow signatures of monthly high flows, spatial variability of high flows, duration of low flows and constancy of daily flow. Nevertheless, there remains large potential for model improvements and we suggest both redoing the calibration and reconsidering parts of the model structure for the next WWH version. The calibration cycle should be repeated a couple of times to find robust values under new fixed parameter conditions. For the next iteration, special focus will be given to precipitation, evapotranspiration, soil storage, and dynamics from hydrological features, such as lakes, reservoirs, glaciers, and floodplains. This first model version clearly indicates challenges in large scale modelling, usefulness of open data and current gaps in processes understanding. Parts

of the WWH can be shared with other modellers working at the regional scale to appreciate local knowledge, establish a critical mass of experts and improve the model in a collaborative manner. Setting up a global catchment model has to be a long-term commitment of continuous model refinements to achieve ~~successful and truly~~more useful results for water management.

## 1. Introduction

Hydrological models are useful tools to better understand processes behind observation, to reconstruct past events and to predict future events, as well as to explore the impact of various scenarios of change in flow controlling factors, such as climate or human activities. Catchment models were traditionally often applied in small well-monitored rivers under pristine conditions, to understand mechanisms in flow generation (e.g. Bergström and Forsman, 1973; Beven and Kirby, 1979; Lindström et al., 1997) or to support flow forecasts at warning services (e.g. Arheimer et al., 2011). However, a combination of societal requests and scientific initiatives has changed this context for catchment modelling recently. As catchment models are mimicking observation through calibration procedures, they have high credibility among practitioners and water managers. Hence, they are used operationally in many societal sectors, to provide for instance design values for infrastructure, water allocation schemes, navigation routes, flood warnings, environmental-status indices or optimal industrial-water use. Currently, all these users of catchment model outputs also face climate change and seek data and information to best implement climate adaptation for their specific business. Hence, catchment models are also used to estimate climate change impact.

The catchment research community has embraced this applied focus and, at the same time, expanded the geographical domain to multi-catchments. The applied focus is illustrated by the new decade of the International Association of Hydrological Sciences (IAHS) called “Panta Rhei”, which addresses change in hydrology and society (Montanari et al., 2013) and focuses on the human impact on the water cycle instead of traditional pristine conditions. The spatial expansion, on the other hand, is driven by accelerating advances in hydrological research as described by Archfield et al. (2015). For instance, comparative hydrology (Falkenmark and Chapman, 1989) or large sample hydrology (Gupta et al., 2014) show the potential to advance science by addressing a larger domain with multiple catchments than just exploring one single catchment at a time. Similarly, the previous scientific decade of IAHS “Predictions in Un-gauged Basins”, PUB (Hrachowitz et al., 2013; Bloeschl et al., 2013), resulted in methods to maintain the procedures typical for catchment modelling when parameters are transferred to areas without observed time-series of river flow, such as regionalization, parameter constraints, and Monte Carlo approaches for empirical quality control, to ensure that the process description is realistic and account for uncertainties. This opened up for catchment models to be tested and applied also at the continental scale (e.g. Pechlivanidis and Arheimer, 2015; Abbaspour et al., 2015; Donnelly et al., 2016), where normally other types of hydrological models were applied, using other modelling procedures and showing other advantages than the methods used by the catchment modelling community (see e.g. Archfield et al., 2015). Such large-scale models are for instance water allocation models (e.g. Arnell, 1999; Vörösmarty et al., 2000; Döll et al., 2003) or meteorological land-surface models (e.g. Liang et al., 1994; Woods et al.,

1998; Pitman, 2003; Lawrence et al., 2011) sometimes with more advanced routing schemes (e.g. Alferi et al., 2013). These more traditional global and continental modelling approaches can now be compared to hydrological catchment models in large-scale applications (Fig. 1).

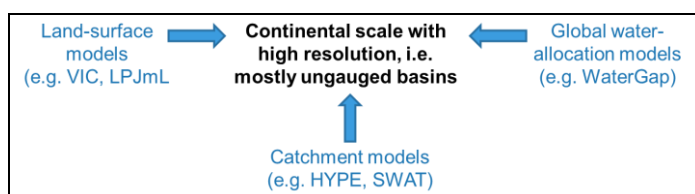

**Figure 1.** Different modelling communities who can now start comparing their methods.

Other important factors, which nowadays allow catchment modelling at the global scale, are computational capacity and open global data sources. The methods for applying and evaluating catchment models are computationally heavy. The advances in application routines and evaluation frameworks, such as GLUE (Beven and Binley, 1992), DREAM (Laloy and Vrugt, 2012), or methods in the SAFE toolbox (Pianosi et al., 2015) have become possible due to the fact that the catchment models themselves are normally quick to run even on a personal computer. With increasing computational capacity, these methods are now possible to apply also in a multi-catchment approach for a large domain (i.e. nested catchment units instead of grids, and entire landmass coverage instead of isolated catchments). Most important for catchment modelling, however, is the recent explosion of open and readily available data sources globally, which makes it possible to delineate the catchment borders, find input data at relevant scale to set up the catchment models, and to assign time-series of observed flow at some catchment outlets. This enables the use of recognised methods in catchment modelling for parameter estimation and model evaluation, as described in the following paragraphs. Using catchments instead of grids as a calculation unit also makes it possible to apply an ecosystem approach and account for spatial co-evolution of processes at the landscape scale (e.g. Blöschl et al., 2013). Model parameters can thus be linked to catchment state from interacting entities and not only to aggregation of separated building blocks of the catchment.

In the early 1970's, model parameters were calibrated using a rather simple curve fitting towards observed time-series of river flow in a specific catchment outlet (e.g. Bergström and Forsman, 1973). Since then the methods for parameter estimation have become more sophisticated, especially when the objective is regionalisation across many catchments at large scale (e.g. Beck et al., 2016). Some common approaches use: (i) the same parameters based on geographic proximity (e.g. Merz and Blöschl, 2004; Oudin et al., 2008); (ii) regression models between parameter values and catchment characteristics (Hundecha and Bárdossy, 2004; Samaniego et al., 2010; Hundecha et al., 2016); (iii) simultaneous calibration in multiple representative catchments with similar climatic and/or physiographic characteristics (e.g. Arheimer and Brandt, 1998; Fernandez et al., 2000; Parajka et al., 2007). In this study, we apply a variety of the latter, using a stepwise approach (e.g. Strömqvist et al., 2012; Pechlivanidis and Arheimer, 2015; Donnelly et al., 2016; Andersson et al., 2017) trying to isolate hydrological processes and calibrate them separately against observed river flow in selected

representative basins across the entire globe, although, some hydrological features as large lakes and floodplains were calibrated individually.

The hypothesis tested in the present study states that, it is now possible and timely to apply catchment modelling techniques at the global scale. We address this hypothesis by applying a catchment model world-wide and then evaluating the results using statistical metrics for time-series and flow signatures. To our knowledge, this is the first time a catchment model was applied world-wide covering the entire globe with relatively high resolution, providing an average subbasin size of ~1000 km<sup>2</sup> (WWH version 1.3). Our specific objective is to provide a harmonized way to predict hydrological variables (especially river flow and the water balance) globally, which can also be shared for further refinement to assist in regional and local water management wherever hydrological models are currently lacking. To address this objective, we (i) compile open global data from >30 sources, including for instance topography and river routing, meteorological forcing, physiographic land characteristics and in total some 20 000 time-series of river flow world-wide, (ii) apply the open-source code of the Hydrological Predictions for the Environment, HYPE model (Lindström et al., 2010), (iii) estimate model parameter values using a new stepwise calibration technique addressing the major hydrological processes and features world-wide, and (iv) compute metrics and flow signatures, and compare model performance with physiographic variables to judge model usefulness. We then pose the scientific question: How far can we reach in predicting river flow globally, using integrated catchment modelling, open global data and readily available time-series for calibration?

## 2. The HYPE model

The development of the HYPE model development was initiated in 2002, primary to support the implementation of the EU Water Framework Directive in Sweden (Arheimer and Lindström, 2013). It was originally designed to estimate water quality status, but is now also used operationally at the Swedish hydrological warning service at SMHI for flood and drought forecasting (e.g. Pechlivanidis et al., 2014). The water and nutrient model is applied nationally for Sweden (Strömqvist et al., 2012), the Baltic Sea basin (Arheimer et al., 2012) and Europe (Donnelly et al., 2013). It also provides operational hydrological forecasts for Europe at short-term and seasonal scale and it has been subjected to several large-scale applications across the world, e.g. the Indian subcontinent (Pechlivanidis and Arheimer, 2015) and the Niger River (Andersson et al., 2017). One of the main drivers for HYPE applications has been climate-change impact assessments, for which its results have been compared to other models in selected catchments across the globe (Geflan et al., 2017; Gosling et al., 2017; Donnelly et al., 2017).

The HYPE model code (Lindström et al., 2010) represents a rather traditional integrated catchment model, describing major water pathways and fluxes in a catchment ensuring that the mass of water mass is conserved at each time step. Parameter values regulate the fluxes between water storages in the landscape and interaction with boundary condition of the atmosphere and deep ground water aquifers (see detailed model documentation at hypeweb.smhi.se). It is forced by precipitation and temperature at daily or hourly time-step, and start by calculating the water balance of Hydrological Response Units, which is the finest calculation unit in each catchment. In the WWH set-up, the HRUs

Formaterat: Normal, Ingen numrering

were defined by land-cover, elevation and climate, without specific consideration to further definition of soil properties. This was guided by recent studies indicating that soil water storage and fluxes rather well related to vegetation type and climate conditions rather than soil properties (e.g. Troch et al., 2009; Gao et al., 2014). HYPE has maximum three layers of soil and these were all applied in the WWH, with a different hydrological response from each one for each HRU. The first layer corresponds to some 25 cm, the second to some 1-2 meters and the third can be deep also accounting for ground water. A specific routine can account for deep aquifers, but this was not applied in the WWH due to lack of local or regional information of aquifer behavior. HYPE has a snow routine to account for snow storage and melt, while a glacier routine accounts for ice storage and melt. Mass balances of glaciers were based on the observations provided in the Randolph Glacier Inventory (Arendt et al., 2015) and fixed separately in the model set-up.

There are a number of algorithms available to calculate potential evapotranspiration (PET) in HYPE. For the WWH we used the algorithms that had been judged most appropriate in previous HYPE applications, giving Jensen-Haise (Jensen and Haise, 1963) in temperate areas, modified Hargreaves (Hargreaves and Samani, 1982) in arid and equatorial areas, and Priestly Taylor (Priestly and Taylor, 1972) in polar and snow /ice dominated areas. River flow is routed from upstream catchments to downstream along the river network, where lakes and reservoirs may dampen the flow according to a rating curve. A specific routine is used for floodplains to allow the formation of temporary lakes, which may be crucial especially in inland deltas (Andersson et al., 2017). Evaporation takes place from all water surfaces, including snow and canopy. The HYPE source code, documentation and user guidance are freely available at <http://hypecode.smhi.se/>.

Ändrad fältkod

## 2.3. Data

### 2.3.1 Physiographic data

For catchment delineation and routing, topographical data is needed, but none of the hydrologically refined databases cover the entire land surface of Earth and therefore we had to merge several sources of information (Table 1). Most of the globe (from 60S to 80N) is covered by GWD-LR (Global Width Database of Large Rivers) 3 arc sec (Yamazaki et al. 2014), apart from the very northern part close to the Arctic Sea, for which HYDRO1K 30 arc sec (USGS) is used available. For Greenland, we used GIMP-DEM (Greenland Ice Mapping Project) 3 arc sec (Howat et al. 2014) and for Iceland the National data from the meteorological office. For the latter we merged the catchments to better fit the overall resolution, going from 27 000 catchments to 253. Each of the above datasets was used independently in the delineation.

Additional data was gathered to help with defining catchments as the delineation of catchments can be difficult in some environments. In flat areas we consulted previous mapping and hydrographical information of floodplains, prairies and deserts (Table 1). Karstic areas are unpredictable due to lack of subsurface information of underground channels crossing surface topography and thus needed to be defined and evaluated separately. Finally, flood risk areas (UNEP/GRID-Europe ; Table 1) were recognized as potentially important, enabling the use of model results in combination with hydraulic

Formaterat: Engelska (USA)

models, and thus also had to be identified so that model results can be extracted for such applications.

**Table 1.** Databases used for catchment delineation, routing and elevation in WWH version 1.3.

| Type                                                                           | Dataset/Link                                                                                                                                                                                                                                                                                                                                                                                                                                     | Provider/Reference                                                                             |
|--------------------------------------------------------------------------------|--------------------------------------------------------------------------------------------------------------------------------------------------------------------------------------------------------------------------------------------------------------------------------------------------------------------------------------------------------------------------------------------------------------------------------------------------|------------------------------------------------------------------------------------------------|
| Topography (Flow accumulation, flow direction, digital elevation, river width) | GWD-LR (3 arcsec) <a href="http://hydro.iis.u-tokyo.ac.jp/~yamada/GWD-LR/">http://hydro.iis.u-tokyo.ac.jp/~yamada/GWD-LR/</a><br>GIMP-DEM (3 arcsec) <a href="https://bpcrc.osu.edu/gdg/data/gimpdem">https://bpcrc.osu.edu/gdg/data/gimpdem</a><br>HYDRO1K (30 arcsec) <a href="https://lta.cr.usgs.gov/HYDRO1K">https://lta.cr.usgs.gov/HYDRO1K</a><br>SRTM (3 arcsec) <a href="https://lta.cr.usgs.gov/SRTM">https://lta.cr.usgs.gov/SRTM</a> | Yamazaki et al., 2014<br>Howat et al., 2015<br>United State Geological Survey – (USGS)<br>USGS |
| Non-contributing areas in Canada                                               | Areas of Non-Contributing Drainage (AAFC Watersheds Project – 2013) <a href="https://open.canada.ca/data/dataset/67c8352d-d362-43dc-9255-21e2b0cf466c">https://open.canada.ca/data/dataset/67c8352d-d362-43dc-9255-21e2b0cf466c</a>                                                                                                                                                                                                              | Government Canada                                                                              |
| Watershed delineation (Iceland)                                                | IMO subbasins and main river basins <a href="http://en.vedur.is/hydrology/">http://en.vedur.is/hydrology/</a>                                                                                                                                                                                                                                                                                                                                    | Icelandic Met Office (IMO)                                                                     |
| Karst                                                                          | World Map of Carbonate Rock Outcrops v3.0 <a href="http://digital.lib.usf.edu/SFS0055342/00001">http://digital.lib.usf.edu/SFS0055342/00001</a>                                                                                                                                                                                                                                                                                                  | Ford (2006)                                                                                    |
| Global Flood Risk                                                              | Global estimated risk index for flood hazard <a href="http://ihp-wins.unesco.org/layers/geonode:fl1010irmt">http://ihp-wins.unesco.org/layers/geonode:fl1010irmt</a>                                                                                                                                                                                                                                                                             | UNEP/GRID-Europe                                                                               |
| Floodplains                                                                    | Global Lake and Wetland Database (GLWD) <a href="https://www.worldwildlife.org/publications/global-lakes-and-wetlands-database-lakes-and-wetlands-grid-level-3">https://www.worldwildlife.org/publications/global-lakes-and-wetlands-database-lakes-and-wetlands-grid-level-3</a>                                                                                                                                                                | Lehner and Döll, 2004                                                                          |
| Desert areas                                                                   | World Land-Based Polygon Features <a href="https://geo.nyu.edu/catalog/stanford-bh326sc0899">https://geo.nyu.edu/catalog/stanford-bh326sc0899</a>                                                                                                                                                                                                                                                                                                | University of New York                                                                         |

Ändrad fältkod

For catchment characteristics governing the hydrological processes in HYPE, the ESA CCI Landcover version 1.6.1 epoch 2010 (300 m) was the baseline, but several other data sources were used to adjust and add information to some hydrologically important features, such as glaciers, lakes, reservoirs, irrigated crops, and climate zone (Table 2).

**Table 2.** Databases used to assign land cover, waterbodies and climate to catchments in WWH version 1.3.

| Type                       | Dataset/Link                                                                                                                                           | Provider/References                                |
|----------------------------|--------------------------------------------------------------------------------------------------------------------------------------------------------|----------------------------------------------------|
| Land cover characteristics | ESA CCI Landcover v 1.6.1 epoch 2010 (300 m) <a href="https://www.esa-landcover-cci.org/?q=node/169">https://www.esa-landcover-cci.org/?q=node/169</a> | ESA Climate Change Initiative - Land Cover project |

|                        |                                                                                                                                                                                                                                                                                  |                                                    |                |
|------------------------|----------------------------------------------------------------------------------------------------------------------------------------------------------------------------------------------------------------------------------------------------------------------------------|----------------------------------------------------|----------------|
| Glaciers               | Randolph Glacier Inventory (RGI) v 5.0<br><a href="https://www.glims.org/RGI/randolph50.html">https://www.glims.org/RGI/randolph50.html</a>                                                                                                                                      | RGI Consortium                                     | Ändrad fältkod |
| Greenland icesheet     | Greenland Glacier Inventory                                                                                                                                                                                                                                                      | Rastner et al, 2012                                |                |
| Lakes                  | ESA CCI-LC Waterbodies 150 m 2000 v 4.0 <a href="https://www.esa-landcover-cci.org/?q=node/169">https://www.esa-landcover-cci.org/?q=node/169</a>                                                                                                                                | ESA Climate Change Initiative - Land Cover project | Ändrad fältkod |
| Lakes                  | Global Lake and Wetland Database 1.1 (GLWD)<br><a href="https://www.worldwildlife.org/publications/global-lakes-and-wetlands-database-large-lake-polygons-level-1">https://www.worldwildlife.org/publications/global-lakes-and-wetlands-database-large-lake-polygons-level-1</a> | Lehner and Döll, 2004                              | Ändrad fältkod |
| Lake depths            | Global Lake Database v2(GLDB) <a href="http://www.flake.igb-berlin.de/ep-data.shtml">http://www.flake.igb-berlin.de/ep-data.shtml</a>                                                                                                                                            | Kourzeneva, 2010, Choulga, 2014                    |                |
| Reservoirs and dams    | Global Reservoir and Dam database v 1.1 (GRanD)<br><a href="http://www.gwsp.org/products/grand-database.html">http://www.gwsp.org/products/grand-database.html</a>                                                                                                               | Lehner et al., 2011                                | Ändrad fältkod |
| Irrigation             | GMIA v5.0<br><a href="http://www.fao.org/nr/water/aquastat/irrigationmap/index10.stm">http://www.fao.org/nr/water/aquastat/irrigationmap/index10.stm</a>                                                                                                                         | Siebert et al., 2013                               | Ändrad fältkod |
|                        | MIRCA v1.1 <a href="http://www.uni-frankfurt.de/45218031/data_download">http://www.uni-frankfurt.de/45218031/data_download</a>                                                                                                                                                   | Portmann et al., 2010                              | Ändrad fältkod |
| Climate classification | Köppen-Geiger Climate classification, 1976-2000, v June 2006<br><a href="http://koeppen-geiger.vu-wien.ac.at/">http://koeppen-geiger.vu-wien.ac.at/</a>                                                                                                                          | Kottek et al., 2006                                | Ändrad fältkod |

214

## 2.23.2 **Forcing Meteorological data**

216 The WWH model uses time-series of daily precipitation and temperature to make calculations on a  
217 daily time-step. All catchment models require initializations of the current state of the snow, soil and  
218 lake (and sometimes river) storages. At the global scale, a seamless dataset for several decades is  
219 necessary for consistent model forcing, to also cover hydrological features with large storage  
220 volumes. For WWH version 1.3 precipitation and temperature were achieved from the Hydrological  
221 Global Forcing Data (HydroGFD; Berg et al., 2018), which is an in-house product of SMHI that  
222 combines different climatological data products across the globe. This global dataset spans a long  
223 climatological period up to near-real-time and forecasts (from 1961 to 6 months ahead). The period  
224 used in this study, is primarily based on the global (50 km grid) re-analysis product ERA-interim (Dee  
225 et al., 2011) from ECMWF, which is further bias adjusted versus other products using observations,  
226 e.g. versions of CRU (Harris and Jones, 2014) and GPCC (Schneider et al, 2014). The HydroGFD  
227 dataset is produced using a method for bias adjustment, which is similar to the method by Weedon  
228 et al. (2014) but additionally uses updated climatological observations, and, for the near-real-time,  
229 interim products that apply similar methods. This means that it can run operationally in near-real-  
230 time. The dataset is continuously upgraded and in the present study, we used the HydroGFD version  
231 2.0.

232

## 2.33.3 **Observed river flow**

234 Catchment models need time-series of hydrological variables for parameter estimation and model  
235 evaluation. Metadata and [daily and monthly](#) time-series from gauging stations were collected from  
236 readily available open data sources globally (Table 3). In total, information from 21 704 gauging  
237 stations could be assigned to a catchment outlet. Of these, time-series could be downloaded for 11

369 while 10 336 could only assist with metadata, such as upstream area, river name, elevation or  
 239 natural of regulated flow. The time-series were screened for missing values, inconsistency, skewness,  
 240 trends, inhomogeneity, and outliers (Crochemore et al., 2019manuscript). Only stations representing  
 241 the resolution of the model ( $\geq 1000 \text{ km}^2$ ) and with records of at least 10 consecutive years between  
 242 1981 and 2012 were considered for model evaluation. With these criteria, 5338 time-series were  
 243 finally used for evaluating model performance, of which 2863 represented completely independent  
 244 model validation and 2475 were also involved when estimating some of the model parameters.

245  
 246 **Table 3.** Databases used for time-series of water discharge and location of gauging station when estimating  
 247 parameters and evaluating the model performance of WWH version 1.3.

| Data type                 | Short Name/Link                                                                                                                                                                                                                                                                                                                                    | Coverage            | Provider/References                                             |
|---------------------------|----------------------------------------------------------------------------------------------------------------------------------------------------------------------------------------------------------------------------------------------------------------------------------------------------------------------------------------------------|---------------------|-----------------------------------------------------------------|
| Time-series<br>+ metadata | GRDC<br><a href="https://www.bafg.de/GRDC/EN/Home/homepage_node.html">https://www.bafg.de/GRDC/EN/Home/homepage_node.html</a>                                                                                                                                                                                                                      | Global              | Global Runoff Data Center                                       |
|                           | EWA<br><a href="https://www.bafg.de/GRDC/EN/04_spcldt/bss/42_EWA/ewa.html">https://www.bafg.de/GRDC/EN/04_spcldt/bss/42_EWA/ewa.html</a>                                                                                                                                                                                                           | Europe              | GRDC – EURO-FRIEND-Water                                        |
|                           | Russian River data by Bodo, ds553.2<br><a href="https://rda.ucar.edu/datasets/ds553.2/">https://rda.ucar.edu/datasets/ds553.2/</a>                                                                                                                                                                                                                 | Former Soviet Union | Bodo, 2000                                                      |
|                           | R-ArcticNet v 4.0 <a href="http://www.r-arcticnet.sr.unh.edu/v4.0/index.html">http://www.r-arcticnet.sr.unh.edu/v4.0/index.html</a>                                                                                                                                                                                                                | Arctic region       | Pan-Arctic Project Consortium                                   |
|                           | RIVDIS v 1.1<br><a href="https://daac.ornl.gov/RIVDIS/guides/rivdis_guide.html">https://daac.ornl.gov/RIVDIS/guides/rivdis_guide.html</a>                                                                                                                                                                                                          | Global              | Vörösmarty et al., 1998                                         |
|                           | USGS <a href="https://waterdata.usgs.gov/nwis/sw">https://waterdata.usgs.gov/nwis/sw</a>                                                                                                                                                                                                                                                           | USA                 | U.S. Geological Survey                                          |
|                           | HYDAT<br><a href="https://www.canada.ca/en/environment-climate-change/services/water-overview/quantity/monitoring/survey/data-products-services/national-archive-hydat.html">https://www.canada.ca/en/environment-climate-change/services/water-overview/quantity/monitoring/survey/data-products-services/national-archive-hydat.html</a>         | Canada              | Water Survey of Canada (WSC)                                    |
|                           | Chinese Hydrology Data Project<br><a href="https://depts.washington.edu/shuiwen/index.html">https://depts.washington.edu/shuiwen/index.html</a>                                                                                                                                                                                                    | China               | Henck et al., 2011                                              |
|                           | Spanish Water Authorities<br><a href="https://www.mapama.gob.es/es/ministerio/funciones-estructura/organizacion-organismos/organismos-publicos/confederaciones-hidrograficas/default.aspx">https://www.mapama.gob.es/es/ministerio/funciones-estructura/organizacion-organismos/organismos-publicos/confederaciones-hidrograficas/default.aspx</a> | Spain               | Ecological Transition Ministry                                  |
|                           | WISKI<br><a href="https://vattenwebb.smhi.se/station/">https://vattenwebb.smhi.se/station/</a>                                                                                                                                                                                                                                                     | Sweden              | Swedish Meteorological and Hydrological Institute               |
| Metadata                  | CLARIS-project <a href="http://www.claris-eu.org/">http://www.claris-eu.org/</a>                                                                                                                                                                                                                                                                   | La Plata Basin      | CLARIS LPB- project FP7 Grant agreement 212492                  |
|                           | CWC handbook<br><a href="http://cwc.gov.in/main/webpages/publications.html">http://cwc.gov.in/main/webpages/publications.html</a>                                                                                                                                                                                                                  | India               | Central Water commission (CWC)                                  |
|                           | SIEREM<br><a href="http://www.hydrosiences.fr/sierem/">http://www.hydrosiences.fr/sierem/</a>                                                                                                                                                                                                                                                      | Africa              | Boyer et al., 2006                                              |
|                           | Regional data<br><a href="https://uia.org/s/or/en/1100058436">https://uia.org/s/or/en/1100058436</a>                                                                                                                                                                                                                                               | Congo Basin         | International Commission for Congo-Ubangui-Sangha Basin (CICOS) |
|                           | National data<br><a href="http://www.bom.gov.au/water/hrs/">http://www.bom.gov.au/water/hrs/</a>                                                                                                                                                                                                                                                   | Australia           | BOM (Bureau of Meteorology)                                     |

Ändrad fältkod



|   |                                                                                                                                                                                                                                                                                                           |              |                                                                      |
|---|-----------------------------------------------------------------------------------------------------------------------------------------------------------------------------------------------------------------------------------------------------------------------------------------------------------|--------------|----------------------------------------------------------------------|
| " | Red Hidrometrica SNHN 2013<br><a href="http://geo.gob.bo/geonetwork/srv/dut/catalog.search#/metadata/ff98cf17-f9a8-4a8d-b96c-bf623dd6b13b">http://geo.gob.bo/geonetwork/srv/dut/catalog.search#/metadata/ff98cf17-f9a8-4a8d-b96c-bf623dd6b13b</a>                                                         | Bolivia      | Servicio Nacional de Hidrografía Naval                               |
| " | Estacoes Fluvimetrica<br><a href="http://www.snirh.gov.br/hidroweb/">http://www.snirh.gov.br/hidroweb/</a>                                                                                                                                                                                                | Brazil       | ANA (Agencia Nacional de Aguas)                                      |
| " | Red Hidrometrica<br><a href="http://www.dga.cl/Paginas/default.aspx">http://www.dga.cl/Paginas/default.aspx</a>                                                                                                                                                                                           | Chile        | DGA (Direccion General de Aguas)                                     |
| " | Catalogo Nacional de Estaciones de Monitoreo Ambiental<br><a href="http://www.ideam.gov.co/geoportal">http://www.ideam.gov.co/geoportal</a>                                                                                                                                                               | Colombia     | IDEAM (Instituto de Hidrologia, Meteorologia y Estudios Ambientales) |
| " | Estaciones_Hidrologicas<br><a href="http://www.serviciometeorologico.gob.ec/geoinformacion-hidrometeorologica/">http://www.serviciometeorologico.gob.ec/geoinformacion-hidrometeorologica/</a>                                                                                                            | Ecuador      | INAMHI (Instituto Nacional de Meteorología e Hidrología)             |
| " | National data<br><a href="http://www.senamhi.gob.pe/?p=0300">http://www.senamhi.gob.pe/?p=0300</a>                                                                                                                                                                                                        | Peru         | SENAMHI (Servicio Nacional de Meteorología e Hidrología del Peru)    |
| " | National data<br><a href="http://www.inameh.gob.ve/web/">http://www.inameh.gob.ve/web/</a>                                                                                                                                                                                                                | Venezuela    | IGVSB (Instituto Geográfico de Venezuela Simon Bolivar)              |
| " | Conabio 2008<br><a href="http://www.conabio.gob.mx/informacion/metadata/gis/esthidgw.xml?_httpcache=yes&amp;_xsl=/db/metadata/xsl/fgdc_html.xsl&amp;_indent=no">http://www.conabio.gob.mx/informacion/metadata/gis/esthidgw.xml?_httpcache=yes&amp;_xsl=/db/metadata/xsl/fgdc_html.xsl&amp;_indent=no</a> | Mexico       | Instituto Mexicano de Tecnología del Agua/CONABIO                    |
| " | Niger HYCOS<br><a href="http://nigerhycos.abn.ne/user-anon/htm/">http://nigerhycos.abn.ne/user-anon/htm/</a>                                                                                                                                                                                              | Niger river  | World Hydrological Service System (WHYCOS)                           |
| " | National data<br><a href="https://www.dwa.gov.za/Hydrology/">https://www.dwa.gov.za/Hydrology/</a>                                                                                                                                                                                                        | South Africa | Department Water & Sanitation, Republic of South Africa              |
| " | National data<br><a href="http://publicutilities.govmu.org/English/Pages/Hydrology-Data-Book-2006---2010.aspx">http://publicutilities.govmu.org/English/Pages/Hydrology-Data-Book-2006---2010.aspx</a>                                                                                                    | Mauritius    | Mauritius Ministry of Energy and Public Utilities                    |

Ändrad fältkod

248

### 3.4. Model setupMethods

249

250

251 The WWH is developed incrementally, and the current version 1.3 was based on previous versions,  
252 where version 1.0 only included the most basic functions to run a HYPE model and was forced by  
253 MSWEP (Beck et al., 2017) and CRU (Harris and Jones, 2014). Version 1.2 included distributed  
254 geophysical and hydrographical features, and finally, version 1.3 (described below) included  
255 estimated parameter values and was forced by the meteorological dataset Hydro-GFD, which also  
256 provides operational forecasts at a 50 km grid (Berg et al., 2017). Dynamic catchment models need to  
257 be initialised to account for adequate storage volumes, which may, for instance, dampen or supply  
258 the river flow based on catchment memory (e.g. Iliopoulou et al., 2019). The WWH was initialized by  
259 running for a 15-year warm-up period 1965-1980, which was judged to be enough for more than 90%  
260 of the catchments [by checking the time it takes for runs initialized 20 years apart to converge](#).  
261 [However, a longerLong](#) initialization periods [are-is](#) needed for large lakes with small catchments,  
262 large glaciers, and sinks or rarely-contributing areas.

263 The current model runs at a Linux cluster (using nodes of 8 processors and 16 threads) with  
264 calculations in approximately 1 800 000 hydrological response units (HRUs) and 130 000 catchments  
265 covering the worlds land surface, except for Antarctica. The model runs in parallel in 32  
266 hydrologically-independent geographical domains with a run time of about 3 hours for 30-year daily  
267 simulations. The methods applied for modelling and evaluation mostly follow common procedures  
268 used by the catchment modelling community, as described below.

269

270

### 271 **3.14.1 Catchment delineation and characteristics**

272 Catchment borders were delineated using the World Hydrological Input Set-up Tool (WHIST;  
273 <http://hype.sourceforge.net/WHIST/>), software developed at SMHI that is linked to the Geographic  
274 Information System (GIS) Arc-GIS from ESRI. By defining force-points for catchment outlets in the  
275 resulting topographic database (c.f. Table 1) and criteria for minimum and maximum ranges in  
276 catchment size, the tool delineates catchments and the link (routing) between them. By adding  
277 information from other types of databases, WHIST also aggregates data or uses the nearest grid for  
278 assigning characteristics to each catchment. WHIST handles both gridded data and polygons, and was  
279 used to link all data described in Section 2, such as land-cover, river width, precipitation,  
280 temperature, and elevation, to each delineated catchment. WHIST then compiles the input data files  
281 to a format that can be read by the HYPE source code. The software runs automatically, but also has  
282 a visual interface for manual corrections and adjustments. It may also adjust the position of the  
283 gauging stations to match the river network of a specific topographic database.

284 When setting up WWH, force-points for catchment delineation were defined according to:

- 285 • *Locations of gauging stations in the river network:* in total, catchments were defined for all  
286 21 704 gauging stations which had an upstream area greater than 1000 km<sup>2</sup> (except for data  
287 sparse regions (500 – 1000 km<sup>2</sup>). Their coordinates were corrected to fit with the river  
288 network of the topographic data, using WHIST and manually. Quality checks of catchment  
289 delineation were done towards station metadata and 88% of the estimated catchment areas  
290 were within +/-10% discrepancy towards metadata. These catchments were used in further  
291 analysis for parameter estimation or model evaluation; however, not all of these sites  
292 provided open access to time-series (see Section 2.3).
- 293 • *Outlets of large lakes/reservoirs:* New lake delineation was done to solve the spatial  
294 mismatch between data of the water bodies from various sources (c.f. Table 2). The centroid  
295 of the lakes included in GLWD and GRanD was used as initialization points for a Flood Fill  
296 algorithm, applied over the ESA CCI Water Bodies, followed by manual quality checks. The  
297 outlet location was defined using the maximum upstream area for each lake. In total, around  
298 13 000 lakes and 2500 reservoirs > 10 km<sup>2</sup> were identified globally. The new dataset was  
299 tested against detailed lake information for Sweden, which represents one of the most lake-  
300 dense regions globally. Merging data from the two databases and adjusting to the  
301

Ändrad fältkod

Formaterat: Engelska (USA)

topographic data used was judged more realistic for the global hydrological modelling than only using one dataset.

- *Large cities and cities with high flood risk:* The UNEP/GRID-Europe database (Table 1) was used to define flood-prone areas for which the model may be useful in the future. The criteria for assigning a force point was city areas of  $> 100 \text{ km}^2$  (regardless of the risks on the UNEP scale) or city areas of  $10\text{-}100 \text{ km}^2$  with risk 3-5 and an upstream area  $> 1000 \text{ km}^2$ . This was only considered if there was no gauging station within 10 km from the city. This gave another 2 439 forcing points to the global model.
- *Catchment size:* the goal was to reach an average size of some  $1000 \text{ km}^2$ , for practical (computational) and scientific reasons, reflecting uncertainty in input data. Criteria in WHIST were set to reach maximum catchment size of  $3000 \text{ km}^2$  in general and  $500 \text{ km}^2$  in coastal areas with  $< 1000 \text{ m}$  elevation (to avoid crossing from one side to another of a narrow and high island or peninsula). Post-processing was then done for the largest lakes, deserts, and floodplains, following specific information on their character (see data sources in Table 2).

Using this approach, the land surface of the Earth (i.e. 135 million  $\text{km}^2$  when excluding Antarctica) was divided into 131 296 catchments with an average size of  $1020 \text{ km}^2$ . Flat land areas of deserts and floodplains ended up with somewhat larger catchments, about  $4500 \text{ km}^2$  and  $3500 \text{ km}^2$ , respectively. Around 23.8% of the land surface did not drain to the sea but to sinks (Fig. 2), the largest single one being the Caspian Sea. This water was evaporated from water surfaces but also percolated to groundwater reservoirs. Moreover, several areas across the globe are of Karstic geology with wide underground channels, which does not follow the land-surface topography. Sinks within Karst areas according to the World Map of Carbonate Rock outcrops (Table 1) were linked to “best neighbour” and inserted to the river network. The Canadian prairie also encompasses a large number of sinks due to climate and topography, and there existed, but here we could apply a national dataset from Canada with well-defined noncontributing areas to adjust the routing in this area.

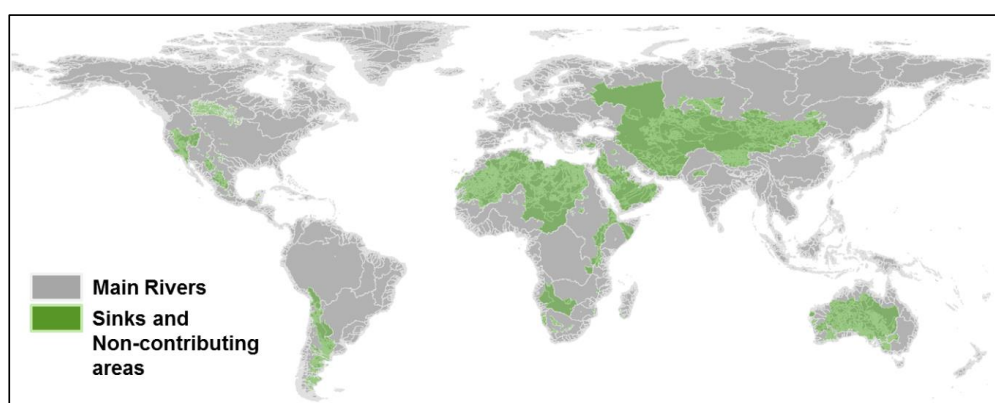

**Figure 2.** Major river basins and areas not contributing to river flow from land to the sea.

The land-cover data from ESA CCI LC v1.6 (Table 2) was used as the base-line for HRUs. It has 36 classes and subclasses and three of these were adjusted using additional data to improve the quality; (1) by using glacier ~~delineated outlines from by the~~ RGI v5 and comparing spatially the outlines of both sources, we avoided overestimation of the glacier area; (2) by using GMIA and MIRCA in a data fusion algorithm to create a more robust new irrigation database, we added irrigation ~~where this~~ information ~~where is was~~ missing and underestimated; (3) by combining several sources of water bodies sources (see Table 2) and spatial analyses (e.g. a flood fill algorithm and geospatial tools) we differentiated one general class of waterbodies into four: large lakes, small lakes, rivers, and coastal sea, which makes more sense in catchment modelling. Five elevation zones were derived to differentiate land-cover classes with altitude (0-500 m, 500-1000 m, 1000-2000 m, 2000-4000 m and 4000–8900 m) as the hydrological response may be very different at different altitude due to vegetation growth and soil properties. The land-cover at these elevations was thus treated as a specific HRU globally. In total, this resulted in 169 HRUs.

All catchments were characterized according to Köppen-Geiger (Table 2) to assign a PET algorithm (see section 3.2) but the characteristics did not include soil properties, which is common in catchment hydrology. The approach when setting up HYPE was to use the possibility to assign hydrologically active soil depth for the HRUs instead (see Section 2 on HYPE model), based on the variability in vegetation, climate and elevation they represent as suggested by Troch et al. (2009) and Gao et al. (2014). However, a few distinct soil properties were unavoidable beside the general soil to describe the hydrological processes; these were impermeable conditions of urban and rock environments, and infiltration under water and rice fields.

### 3.2 The HYPE model

~~The HYPE model development was initiated in 2002, primary to support the implementation of the EU Water Framework Directive in Sweden (Arheimer and Lindström, 2013). It was originally designed to estimate water quality status, but is now also used operationally at the Swedish hydrological warning service at SMHI for flood and drought forecasting (e.g. Pechlivanidis et al., 2014). The water and nutrient model is applied nationally for Sweden (Strömqvist et al., 2012), the Baltic Sea basin (Arheimer et al., 2012) and Europe (Donnelly et al., 2013). It also provides operational hydrological forecasts for Europe at short term and seasonal scale and it has been subjected to several large scale applications across the world, e.g. the Indian subcontinent (Pechlivanidis and Arheimer, 2015) and the Niger River (Andersson et al., 2017). One of the main drivers for HYPE applications has been climate change impact assessments, for which its results have been compared to other models in selected catchments across the globe (Geflan et al., 2017; Gosling et al., 2017; Donnelly et al., 2017).~~

~~The HYPE model code (Lindström et al., 2010) represents a rather traditional integrated catchment model, describing major water pathways and fluxes in a catchment. It is forced by precipitation and temperature at daily or hourly time step, and start by calculating the water balance of Hydrological Response Units, which is the finest calculation unit in each catchment. In the WWH set up, the HRUs were defined by land cover, elevation and climate, without specific consideration to further definition of soil properties. This was guided by recent studies indicating that soil water storage and fluxes rather relate to vegetation type and climate conditions than soil properties (e.g. Troch et al.,~~

2009; Gao et al., 2014). HYPE has maximum three layers of soil and these were all applied in the WWH, with a different hydrological response from each one for each HRU. The first layer corresponds to some 25 cm, the second to some 1–2 meters and the third can be deep also accounting for ground water. A specific routine can account for deep aquifers, but this was not applied in the WWH due to lack of local or regional information of aquifer behavior. HYPE has a snow routine to account for snow storage and melt, while a glacier routine account for ice storage and melt. Mass balances of glaciers were based on the observations provided in the Randolph Glacier Inventory (Arendt et al., 2015) and fixed separately in the model set-up. There are a number of algorithms available to calculate potential evapotranspiration (PET) in HYPE. For the WWH we used the algorithms that had been judged most appropriate in previous HYPE applications, giving Jensen-Haise (Jensen and Haise, 1963) in temperate areas, modified Hargreaves (Hargreaves and Samani, 1982) in arid and equatorial areas, and Priestly-Taylor (Priestly and Taylor, 1972) in polar and snow/ice dominated areas. River flow is routed from upstream catchments to downstream along the river network, where lakes and reservoirs may dampen the flow according to a rating curve. A specific routine is used for floodplains to allow the formation of temporary lakes, which may be crucial especially in inland deltas (Andersson et al., 2017). Evaporation takes place from all water surfaces, including snow and canopy. The HYPE source code, documentation and user guidance are freely available at <http://hypecode.smhi.se/>.

Ändrad fältkod

### 3.34.2 Step-wise parameter estimation

The method to assign parameter values for the global model domain aimed at finding (i) robust values also valid for ungauged basins, as well as (ii) reliable process description of dominating flow generation processes and water storage along the flow paths. The first aim was addressed by simultaneous calibration in multiple representative catchments world-wide. Spatial heterogeneity was accounted for by separate calibration of catchments representing different climate, elevation, and land-cover globally. The second aim was addressed by applying a step-wise approach following the HYPE process description along the flow paths, only calibrating a few parameters governing a specific process at a time (Arheimer and Lindström, 2013). The estimated parameter values were then applied wherever relevant in the whole geographical domain, i.e. world-wide.

Different catchments were selected globally to best represent each process calibrated (Fig. 3). Processes were assumed to be linked to different physiographic characteristics (Kuentz et al., 2017) and catchments with gauging stations where these characteristics were most prominent in the upstream area were selected (i.e. the representative gauged basin method). For HRUs, separate calibration was done for the snow-dominated areas (>10% of precipitation falling as snow), as the snow processes give such strong character to the runoff response and simultaneous calibration with catchments lacking snow may thus underestimate other flow-controlling processes. The HRUs based on the ESA CCI 1.6 data was aggregated from 36 classes into 10 (Table 4) for more efficient calibration and to ensure that some 50% of the gauged catchment selected was representing the appointed land-cover. Some local hydrological features such as large lakes and floodplains were calibrated individually. When evaluating the effect of this, we discovered some major bias for the

Great Lakes in North America and Malawi and Victoria lakes in Africa. Finally, we introduced the 11<sup>th</sup> step to calibrate the evaporation of these separately (Fig 3).

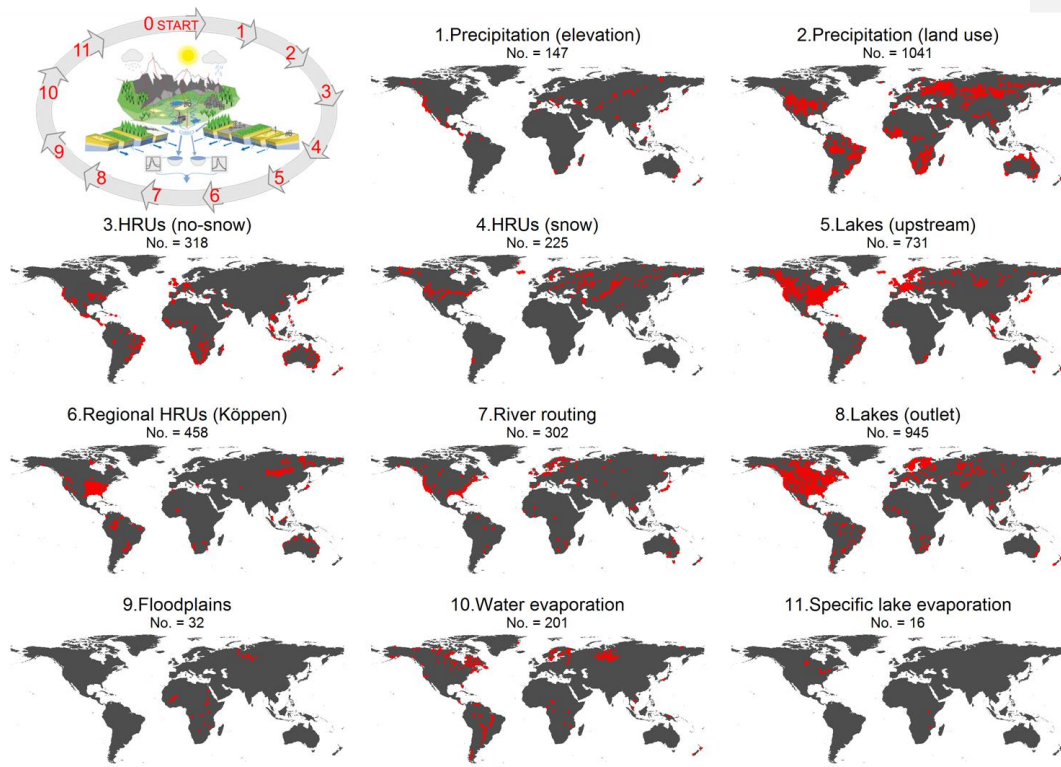

**Figure 3.** Number of gauging stations and their location that was used in each step of the stepwise parameter estimation procedure and evaluation against in-situ observations world-wide.

In total, 6519 river gauges were used in the calibration process, but normally only affecting few model parameters in the stepwise procedure. 1181 of these gauges did not meet the ambition to represent the average catchment resolution and 10 consecutive years between 1981 and 2012, but was still included in some step due to lack of data. Automatic calibration was applied for each subset of parameters and representative catchments in each step, using the Differential Evolution Markov Chain (DEMC) approach (Ter Braak, 2016) to obtain the optimum parameter value in each case. [The advantage of DEMC versus plain DE is both the possibility to get a probability-based uncertainty estimate of the global optimum and a better convergence towards it.](#) The DEMC requires several parameters to be fixed and the choice of these parameters was based on a compromise between convergence speed and the accuracy of the resulting parameter set. Global PET parameter values were fixed first, before starting the step-wise procedure, using the MODIS global evapotranspiration product (MOD16) by Mu et al., (2011) for parameter constraints. The parameter ranges were defined as the median and the 3<sup>rd</sup> quartile of the 10% best agreements between HYPE and MODIS in terms of RE. The first selection was done with 400 runs and then repeated for a second round. In addition, a priori parameters (Table 5) were set for glaciers and soils without calibration, taken from previous applications (e.g. Donnelly et al., 2016; MacDonald et al., 2018). The bare deserts soil was manually

**Formaterat:** Avstånd efter: 0 pt,  
Radavstånd: enkelt, Justera inte  
mellanrum mellan latinsk och asiatisk  
text, Justera inte mellanrum mellan  
asiatisk text och siffror

**Formaterat:** Engelska (USA)

calibrated only using 4 stations in the Sahara desert. The area and volume of glaciers were evaluated in 296 glaciers and soil parameters in some 30 catchments. The root zone storage of soils was further calibrated in the parameter setting of each HRU (in step No 4 and 5). While the calibration period was 1981-2012, it was always preceded by 15 years of initialization. Different metrics were chosen as calibration criteria, depending on the character of the parameter and how it influences the model. For instance, Relative Error (RE) was used as a metric in the calibration of precipitation and PET parameters, since the aim was to correctly represent water volumes. On the contrary, Correlation Coefficient (CC) was used when the timing was the main goal (i.e. for river routing or dampening in lakes). If both water volume and timing were required, Kling-Gupta Efficiency (KGE; Gupta et al., 2009) was used (i.e. for soil discharge from HRUs). Wherever possible, calibration was made using a daily time-step, while overall model evaluation on the global scale was made on a monthly time-step.

**Table 4.** Aggregated land covers used for HRUs, their representation in the upstream catchment and the number of gauges available for each land cover when estimating parameter values of WWH v1.3.

| HRU calibration | Aggregated Land cover from ESA CCI 1.6                                             | Land cover | No. gauges (snow area) | No. gauges (no snow) |
|-----------------|------------------------------------------------------------------------------------|------------|------------------------|----------------------|
| Bare            | Bare areas                                                                         | 35%        | 7                      | 32                   |
|                 | Consolidated bare areas                                                            |            |                        |                      |
|                 | Unconsolidated bare areas                                                          |            |                        |                      |
| Crop            | Cropland, rain fed                                                                 | 50%        | 52                     | 30                   |
|                 | Herbaceous cover                                                                   |            |                        |                      |
|                 | Tree or shrub cover                                                                |            |                        |                      |
|                 | Cropland, irrigated or post-flooding irrigated Rice                                |            |                        |                      |
| Grass           | Grass                                                                              | 50%        | -                      | 1                    |
| Mosaic          | Mosaic cropland (>50%) / natural vegetation (tree, shrub, herbaceous cover) (<50%) | 50%        | 39                     | 29                   |
|                 | Mosaic natural vegetation (tree, shrub, herbaceous cover) (>50%) / cropland (<50%) |            |                        |                      |
|                 | Mosaic tree and shrub (>50%) / herbaceous cover (<50%)                             |            |                        |                      |
|                 | Mosaic herbaceous cover (>50%) / tree and shrub (<50%)                             |            |                        |                      |
| Shrub           | Shrubland                                                                          | 50%        | 54                     | 17                   |
|                 | Shrubland evergreen                                                                |            |                        |                      |
|                 | Shrubland deciduous                                                                |            |                        |                      |
|                 | Shrub or herbaceous cover, flooded, fresh/saline/brackish water                    |            |                        |                      |
| Sparse          | Lichens and mosses                                                                 | 35%        | 40                     | 11                   |
|                 | Sparse vegetation (tree, shrub, herbaceous cover) (<15%)                           |            |                        |                      |
|                 | Sparse shrub (<15%)                                                                |            |                        |                      |
|                 | Sparse herbaceous cover (<15%)                                                     |            |                        |                      |
| TreeBrDecMix    | Tree cover, broadleaved, deciduous, closed to open (>15%)                          | 50%        | 26                     | 28                   |
|                 | Tree cover, broadleaved, deciduous, closed (>40%)                                  |            |                        |                      |
|                 | Tree cover, broadleaved, deciduous, open (15-40%)                                  |            |                        |                      |
|                 | Tree cover, mixed leaf type (broadleaved and needleleaved)                         |            |                        |                      |
| TreeBrEvFlood   | Tree cover, broadleaved, evergreen, closed to open (>15%)                          | 50%        | 37                     | 30                   |



|           |                                                            |     |    |    |
|-----------|------------------------------------------------------------|-----|----|----|
|           | Tree cover, flooded, fresh or brakish water                |     |    |    |
|           | Tree cover, flooded, saline water                          |     |    |    |
| TreeNeDec | Tree cover, needleleaved, deciduous, closed to open (>15%) | 50% | 46 | -  |
|           | Tree cover, needleleaved, deciduous, closed (>40%)         |     |    |    |
|           | Tree cover, needleleaved, deciduous, open (15-40%)         |     |    |    |
| TreeNeEv  | Tree cover, needleleaved, evergreen, closed to open (>15%) | 50% | -  | 10 |
|           | Tree cover, needleleaved, evergreen, closed (>40%)         |     |    |    |
|           | Tree cover, needleleaved, evergreen, open (15-40%)         |     |    |    |
| Urban     | Urban                                                      | 50% | 21 | 30 |

### 3.4.4.3 Model evaluation

The model was evaluated against independent observed river flow [by using remaning gauges](#), which ~~was-were~~ not ~~used in~~ chosen for the calibration procedure. The agreement between modelled and observed time-series was evaluated using the statistical metric KGE and its components  $r$ ,  $\beta$  and  $\alpha$ , which are directly linked with CC (Pearson Correlation Coefficient), RE (Relative Error) and RESD (Relative Error of Standard Deviation), respectively (Gupta et al., 2009). KGE is defined as:

$$KGE = 1 - \sqrt{(r-1)^2 + (\alpha-1)^2 + (\beta-1)^2} \quad (\text{Eq. 1})$$

where:

$$r = CC = \frac{cov(x_o, x_s)}{\sigma_s \sigma_o} \quad (\text{Eq. 2})$$

$$\beta = \frac{\mu_s}{\mu_o} ; RE = (\beta - 1) \cdot 100 \quad (\text{Eq. 3})$$

$$\alpha = \frac{\sigma_s}{\sigma_o} ; RESD = (\alpha - 1) \cdot 100 \quad (\text{Eq. 4})$$

$x$  represents the discharge time series,  $\mu$  the mean value of the discharge time series, and  $\sigma$  the standard deviation of the discharge time series. The sub-indexes  $o$  and  $s$  represent observed and simulated discharge time series, respectively. [Thus CC represents how well the model dynamics agree between observations and simulations, i.e. the timing of events but not the magnitude; RE represents the agreement in volume over time; RESD represents how well the model captures the amplitude of the hydrograph. KGE was chosen as performance metric to analysis all these aspects and because it has been found good in capturing both mean and extremes during calibration \(Mizukami et al., 2019\). We used the original version so that our results can easily be compared to other studies reported in the literature, even though non-standard variants may be more efficient \(e.g. Mathevet et al., 2006; Mizukami et al., 2019\).](#)

In addition, a number of flow signatures (Table 5) was calculated to explore which part of the hydrograph is well captured by the model. Flow signatures are used by the catchment modelling community to condense the hydrological information from time-series (Sivapalan, 2005) and the choice of flow signatures was guided by previous studies by Olden and Poff (2003) and Kuentz et al.



(2017). In this study, flow signatures were calculated at 5338 gauging stations globally, based on catchment size and at least 10 years of continuous time-series (see section 2.3).

The model capability in capturing observed flow signatures was then related to upstream physiographical and climatological factors, such as area, mean elevation, drainage density, land-cover, climatic region or aridity index. Catchment modellers tend to study differences and similarities in flow signatures as well as in catchment characteristics to improve understanding of hydrological processes (e.g. Sawicz et al., 2014; Berghuijs et al., 2014; Pechlivanidis and Arheimer, 2015; Rice et al., 2015). Linking catchment descriptors and model performance in hydrological response signatures help the modeler to examine whether the process description and model structure are valid across the landscape or if the regionalization of parameter values must be reconsidered for some parts of a large domain. In addition, this exercise will guide the users to judge under which conditions the model is reliable and thus of any use for decision making. In the present study, the physiographic characteristics of catchments were all extracted from the input data files of the WWH version 1.3. For each gauging station with calculated flow signatures, the catchment characteristics were accumulated for all upstream catchments to account for any potential physiographical influence on the flow signal at the observation site (Table 3). Gauging stations were grouped according to the distribution of each physiographic characteristic and model performances in flow signature representation were computed for each of these groups.

**Table 5.** Flow signatures (FS) from observed time-series and physiographic descriptors (T: topography; LC: Land cover; C: climate) from databases in Section 2.1.

| Variable name        | Description                                                                                                                     | Range              |
|----------------------|---------------------------------------------------------------------------------------------------------------------------------|--------------------|
| skew (FS)            | Skewness = mean/median of daily flows                                                                                           | [0.63 - 70000]     |
| MeanQ (FS)           | Mean specific flow in mm                                                                                                        | [0 - 1024.41]      |
| CVQ (FS)             | Coef. of variation = standard deviation/mean of daily flows                                                                     | [0.01 - 46.4]      |
| BFI (FS)             | Base Flow Index: 7-day minimum flow divided by mean annual daily flow averaged across years                                     | [0 - 0.84]         |
| Q5 (FS)              | 5 <sup>th</sup> percentile of daily specific flow in mm                                                                         | [0 - 218.04]       |
| HFD (FS)             | High Flow Discharge: 10 <sup>th</sup> percentile of daily flow divided by median daily flow                                     | [0 - 1]            |
| Q95 (FS)             | 95 <sup>th</sup> percentile of daily specific flow in mm                                                                        | [0 - 2654.81]      |
| LowFr (FS)           | Total number of low flow spells (threshold equal to 5 % of mean daily flow) divided by the record length                        | [0 - 1]            |
| HighFrVar (FS)       | Coef. of Variation in annual number of high flow occurrences (threshold 75 <sup>th</sup> percentile)                            | [0 - 5.48]         |
| LowDurVar (FS)       | Coef. of Variation in the annual mean duration of low flows (threshold 25 <sup>th</sup> percentile)                             | [0 - 3.78]         |
| Mean30dMax (FS)      | Mean annual 30-days maximum divided by median flow                                                                              | [0 - 29.49]        |
| Const (FS)           | Constancy of daily flow (see Colwell, 1974)                                                                                     | [0.01 - 1]         |
| RevVar (FS)          | Coef. of variation in annual number of reversals (change in sign in the day-to-day change time series)                          | [0 - 5.48]         |
| RBFlash (FS)         | Richard-Baker flashiness: sum of absolute values of day-to-day changes in mean daily flow divided by the sum of all daily flows | [0 - 2]            |
| RunoffCo (FS)        | Runoff ratio: mean annual flow (in mm yr <sup>-1</sup> ) divided by mean annual precipitation                                   | [0 - 1362.52]      |
| ActET (FS)           | Actual evapotranspiration: mean annual precipitation minus mean annual flow (in mm yr <sup>-1</sup> )                           | [-100 - 2660.03]   |
| Area (T)             | Total upstream area of catchment outlet in km <sup>2</sup>                                                                      | [13.5 - 4671536.7] |
| meanElev (T)         | Mean elevation of the catchment in m                                                                                            | [3.63 - 5046.16]   |
| stdElev (T)          | Standard deviation of the elevation of the catchment in m                                                                       | [1.66 - 1595.89]   |
| Meanslope (T)        | Mean slope of the catchment                                                                                                     | [0 - 224.24]       |
| Drainage density (T) | Total length of all streams in the catchment divided by the area of the                                                         | [2.19 - 259798.14] |

|                              |                                                                                                                                                                                                           |                                 |
|------------------------------|-----------------------------------------------------------------------------------------------------------------------------------------------------------------------------------------------------------|---------------------------------|
|                              | catchment                                                                                                                                                                                                 |                                 |
| 13 land cover variables (LC) | % of the catchment area covered by the following land cover types (see Table XX): Water, Urban, Snow & Ice, Bare, Crop, Mosaic, TreeBrEvFlood, TreeBrDecMix, TreeNeEv, TreeNeDec, Shurb, Grass and Sparse | [0 - 1]                         |
| Pmean (C)                    | Mean annual precipitation in mm yr <sup>-1</sup>                                                                                                                                                          | [51.5 - 5894.86]                |
| SI.Precip (C)                | Seasonality index for precipitation:<br>$SI = \frac{1}{\bar{R}} \cdot \sum_{n=1}^{12} \left  \bar{x}_n - \frac{\bar{R}}{12} \right $                                                                      |                                 |
| Tmean (C)                    | $\bar{x}_n$ : mean rainfall of month n; $\bar{R}$ : mean annual rainfall<br>Mean annual temperature in degrees                                                                                            | [-16.93 - 31]<br>[0.08 - 50.06] |
| AI (C)                       | Aridity Index: PET/P, where PET is the mean annual potential evapotranspiration and P the mean annual precipitation                                                                                       | [0.05 - 1.28]                   |
| 5 Köppen regions (C)         | % of the catchment area within the following Köppen regions: A (Tropical), B (Arid), C (Temperate), D (Cold-continental) and E (Polar)                                                                    | [0 - 1]                         |

## 4.5. Results

### 4.5.1 Global river flow and general model performance

WWH version 1.3 ~~successfully~~ describes major hydrological features globally and important spatial variability in factors controlling the runoff mechanisms, although there is still room for improvements over the coming decade(s). The catchment modelling approach with careful consideration to hydrography, resulted in a new database with delineated hydrographical features (e.g. Fig. 4) of major importance for hydrological modelling. The merging of several data sources resulted in consistency between available information on water bodies, topographic data and the river network (e.g. for glaciers, floodplains, lakes, and gauging stations) so that this information can be used in catchment modelling and provide results of river flow at a resolution of some 1000 km<sup>2</sup> globally.

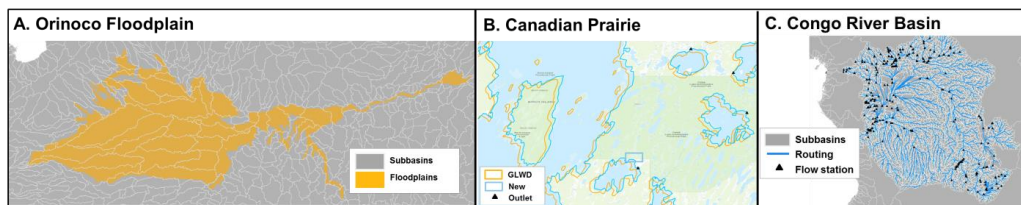

**Figure 4.** Some examples of WWH version 1.3 details in describing hydrography at local and regional scale from supporting GIS layers: A) subbasins of the Orinocco river defined as a connected floodplain; B) adjustment of lake areas (New) from merging several data sources (see Section 2.1 and 3.1) and the original GLWD in the Canadian Prairie; C) river routing and access to flow gauges in the Congo river basin.

The WWH version 1.3 resulted in a realistic spatial pattern of river flow world-wide, clearly identifying desert areas and the largest rivers (Fig. 5). Compared to other global estimates of average water flow in major rivers, HYPE gives results in the same order of magnitude, but of course, comparisons should be based on the same time period to account for natural variability due to

climate oscillations. The Amazon, Congo and Orinocco rivers came out as the three largest ones, where the river flow of the Amazon river is almost 6 times larger than any other river. Compared to recent estimates by Milliman and Farnsworth (2011), HYPE estimated a higher annual average of river flow in Mississippi, St Lawrence, Amur, and Ob, but less in the rest of the top-ten largest rivers of the world, especially relatively lower values were noted for Ganges-Bahamaputra. For World-Wide HYPE, Yangtze river came out as No 11 and Mekong as No 12, and it should be noted that the river flow to Río de la Plata was separated into Paraná River and Uruguay river (the former ranked as No 13 of the largest rivers).

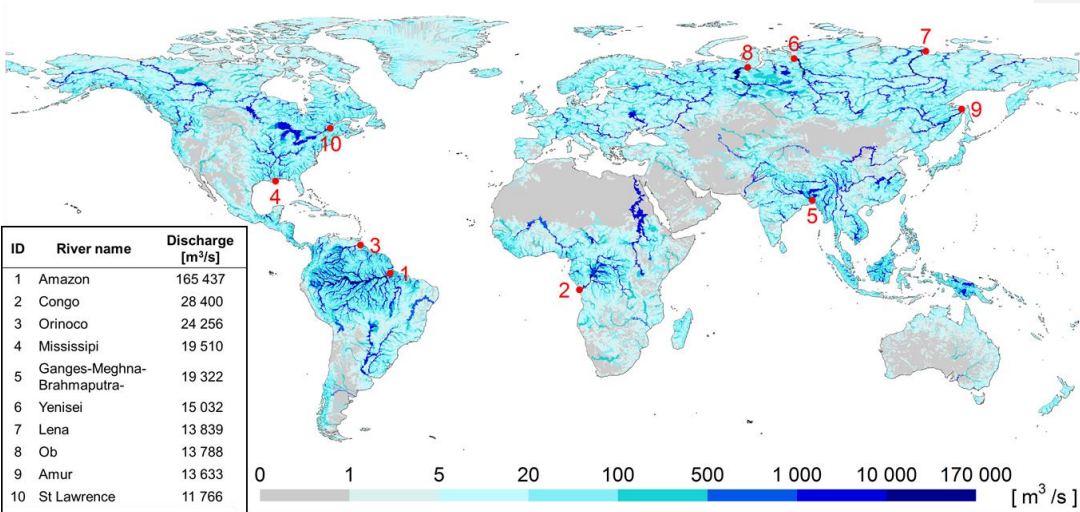

**Figure 5.** Annual mean of river discharge across the globe for the period 1981-2015 estimated with the catchment model WWH version 1.3 (on average 1020 km<sup>2</sup> resolution).

On average, for the whole globe and 5338 gauging stations with validated catchment areas and at least ten years of data, the model performance was estimated to a median monthly KGE of 0.40 (Fig. 6). Model performance was surprisingly similar for the gauges used in parameter estimation and independent ones, with median KGE of 0.41 (2475 stations) and 0.39 (2863 stations), respectively. This indicates that the model results are robust and the same model performance can be assumed also in ungauged basins. Catchment modellers would normally judge these results as poor, but Given that global open input data was used for model setup and rough assumptions were made when generalizing hydrological processes across the globe, the overall model performance meets the expectations. Similar results were recently achieved when Beck et al. (2016) was testing a scheme for global parameter regionalization world-wide; in an ensemble of ten global water allocation or land surface models, the median performance of monthly KGE was found to be 0.22 using 1113 river gauges for mesoscale catchments globally (median size 500 km<sup>2</sup>). The best median monthly KGE was then 0.32 for catchment scale calibration of regionalized parameters, using a gridded HBV model globally (Beck, 2016). Even though it is difficult to compare results when not using the same validation sites or time-period and more concerted actions for model inter-comparison are needed at this scale. Nevertheless, the catchment modelling approach of the present study seems to have better performance than other gridded global modelling concepts of river flow.

Formaterat: Engelska (USA)

The red spots in Figure 6 indicate where the HYPE model fails, such as in the US mid-west (especially Kansas to be precise), north-east of Brazil and parts of Africa, Australia and central Asia. When decomposing the KGE, it was found that the correlation was in general fine. However, the relative error in standard deviation was causing the main problems showing that the HYPE model does not capture the variations of the hydrograph, and instead, generates a too even flow. The relative error also seemed problematic, which indicates problems with the water balance. The model has severe problems with dry regions and areas with large impact from human alteration and water management, where the model underestimates the river flow. Such regions are known to be more difficult for hydrological modelling in general (Bloeschl et al., 2013), but in addition, precipitation data do not seem to fully capture the influence of topography and mountain ranges. The patterns in model performance were further investigated in the analysis of model performance versus flow signatures and physiographic factors (Section 4.3).

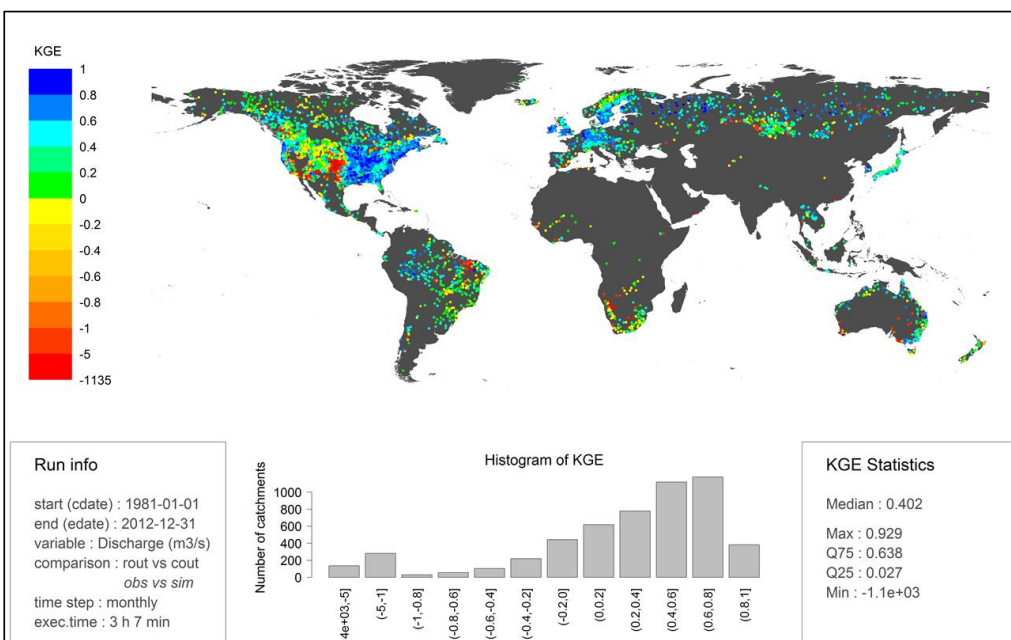

**Figure 6.** Model performance of WWH version 1.3 using the KGE metric of monthly values of  $\geq 10$  years in each of the 5338 gauging sites for the period 1981-2012. Blue and green indicates that the model provides more information than the long-term observed mean value.

## 4.25.2 Global parameter values from step-wise calibration

Both model performance in representative catchments and improvement achieved through calibration varied a lot for each hydrological process considered in the step-wise parameter estimation (Table 6). Although, a large number of river gauges was collected for parameter estimation, only a few could be considered as representative with enough quality assurance. More

gauges in the calibration procedure would probably have given another result. Nevertheless, the results show promising potential in applying the process descriptions of catchment models also at the global scale.

In spite of the wide spread in geographical locations across the globe, a priori values were reasonable for hydrological processes describing glaciers and soils. As shown in Table 6, the water balance (RE) was improved considerably by first calibrating PET globally, and then precipitation vs altitude of catchment and land-cover type. Simultaneous calibration of soil storage and discharge in HRUs increased the KGE both in areas with and without snow by 0.1 on average. For calibration of river routing and rating curves of lake outflows, the correlation coefficient was used to avoid erroneous compensation of the water balance, as the parameters involved should only set the dynamics of flow and not volume. Especially lake processes benefited from calibration. Less convincing was the metrics from calibration of the floodplains, which were not always improved by the floodplain routine applied. Overall, the results indicate that global parameters are to some extent possible for describing hydrological processes world-wide, using a catchment model and globally available data of physiographic characteristics to describe spatial variability. Nevertheless, the WWH v.1.3 model has still considerable potential for improvements and to really make use of more advanced calibration techniques, the water balance needs to be improved first as too much volume error makes the tuning of dynamics difficult.

**Table 6.** Metrics of model performance before and after calibrating various hydrological processes simultaneously at a number of selected river gauges, using the stepwise parameter-estimation procedure globally. Parameter values and names in the HYPE model are given in Appendices.

| Hydrological Process                                                                      | No. gauges | Median value of metric(s) |            |
|-------------------------------------------------------------------------------------------|------------|---------------------------|------------|
|                                                                                           |            | Before                    | After      |
| Potential Evapo-Transpiration (3 PET-algorithms: median of ranges constrained with MODIS) | 0          | RE: 11.5 %                | RE: 0.5%   |
| Glaciers (only evaluated vs mass balance data)                                            | 296        | RE: 0.38%<br>CC: 0.51     | -          |
| Soils (average, rock, urban, water, rice)                                                 | 25         | RE: -14.1%<br>KGE: 0.2    |            |
| Bare soils in deserts (calibrated manually)                                               | 4          | RE: 236.1%                | RE: -18.9  |
| 1. Precipitation: catchment elevation                                                     | 147        | RE: -6.7%                 | RE: 4.4%   |
| 2. Precipitation: land-cover altitude                                                     | 1041       | RE: 24.3%                 | RE: 10.1%  |
| 3. HRUs in areas without snow                                                             | 318        | KGE: 0.16                 | KGE: 0.27  |
| 4. HRUs in areas with snow: ET, recession and active soil depth                           | 225        | KGE: 0.16                 | KGE: 0.24  |
| 5. Upstream lakes                                                                         | 731        | CC: 0.71                  | CC: 0.72   |
| 6. Regionalised ET (in 12 Köppen climate regions)                                         | 458        | KGE: 0.58                 | KGE: 0.62  |
| 7. River routing                                                                          | 302        | CC: 0.70                  | CC: 0.71   |
| 8. Lake rating curve                                                                      | 945        | CC: 0.50                  | CC: 0.59   |
| 9. Floodplains (partly calibrated manually)                                               | 32         | KGE: -0.03                | KGE: 0.03  |
| 10. Evaporation from water surface                                                        | 201        | RE: -20.7%                | RE: -12.2% |

595

596

### 4.35.3 Model evaluation against flow signatures

597 The WWH1.3 is more prone to success or failure in simulating specific flow signatures than to specific  
 598 physiographic conditions, which is visualized by vertical rather than horizontal stripes in Figure 7. In  
 599 general, the model shows reasonable KGE and CC for spatial variability of flow signatures across the  
 600 globe (i.e. a lot of blue in the two panels to the left in Fig. 7). However, the RE and the standard  
 601 deviation of the RE (RESD) are less convincing (i.e. the two panels to the right). This means that the  
 602 model can capture the relative difference in flow signature and the spatial pattern globally, but not  
 603 always the magnitudes, nor the spread between highest and lowest values. The relative errors are  
 604 mostly due to underestimations, except for skewness, low flows and actual potential  
 605 evapotranspiration; the two latter are always over-estimated when not within  $\pm 25\%$  bias. Overall,  
 606 the model shows good potential to capture spatial variability of high flows (Q95), duration of low  
 607 flows (LowDurVar), monthly high flows (Mean30dMax) and constancy of daily flows (Const). These  
 608 results were found robust and independent of metrics or physiography.

609 The model shows most difficulties in capturing skewness in observed time-series (skew), the number  
 610 of high flow occurrences (HighFrVar), and base flow as average (BFI), or absolute low flows (Q5).  
 611 Short-term fluctuations (RevVar and RBFlash) are also rather difficult for the model to capture. Some  
 612 results are not consistent between metrics; for coefficient of variation (CVQ) the RE was good while  
 613 the RESD was poor. This indicates that the model does not capture the amplitude in variation  
 614 between sites even if the bias is small. The opposite was found for high flow discharge (HFD) and  
 615 low-flow spells (LowFr), i.e. poor performance in volumes but RESD showing that the variability is  
 616 captured.

617 For the remaining flow signatures studied, it was interesting to note that the model performance  
 618 could be linked to physiographic characteristics, indicating that the model structure and global  
 619 parameters are valid for some environments but not for others. For instance, the volume of mean  
 620 specific flow (RE of MeanQ) is especially difficult to capture in regions with needle-leaved, deciduous  
 621 trees (TreeNeDec) and for medium and large flows in the Köppen region B (Arid), large flows in D  
 622 (Cold-continental) and small flows in E (Polar). Moreover, the analysis shows that the model tends to  
 623 fail with the mean flow in catchments with high elevation, high slope, small fraction water and urban  
 624 land-cover, and little or much of snow and ice. This shows where efforts need to be taken to improve  
 625 the model in its next version. For other water-balance indices, it was interesting to note that the ratio  
 626 between precipitation and river flow (RunoffCo) show good results (RE  $\pm 25\%$ ) all over Köppen region  
 627 C (Temperate) but otherwise is often underestimated for some parts of the quartile range of  
 628 physiographic variables studied. On the contrary, precipitation minus flow (ActET) is over-estimated  
 629 in parts of the quartile range, except for the good results in Köppen region C, needle-leaved,  
 630 deciduous trees (TreeNeDec) and regions with snow and ice (i.e. where mean specific runoff failed).  
 631 Figure 7 clearly shows the compensating errors between processes governing the runoff coefficient  
 632 and actual evapotranspiration, with one being over-estimated when the other is underestimated for  
 633 the same specific physiographic conditions. This indicates the need for recalibrating the HRUs of

WWH in its next version, but also reconsidering the initial parameters for evapotranspiration and the quality of the precipitation grid and its linkage with the catchments.

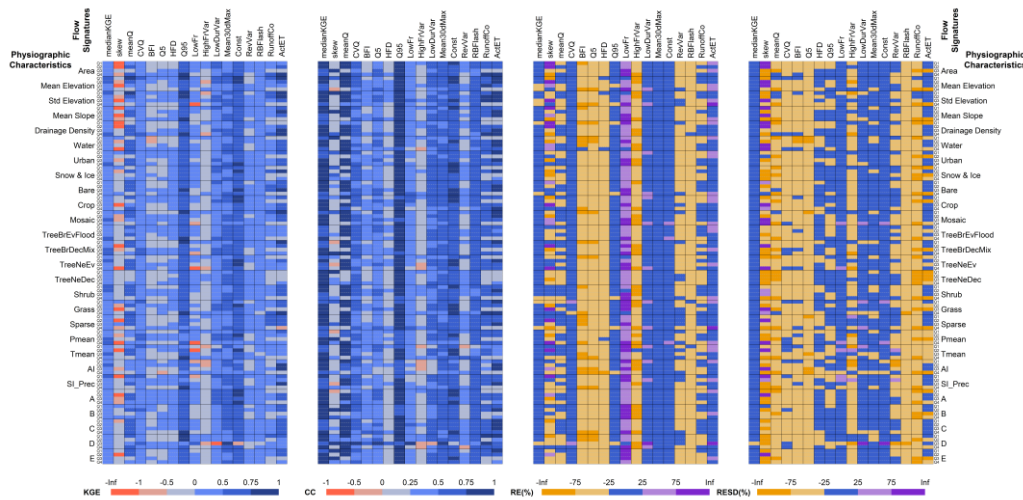

**Figure 7.** Matrix showing the relation between model capacity to capture flow signatures (colors, where blue is good and yellow/red/purple is poor performance) and physiography of catchments, divided into quartiles (Q1-Q4) for characteristics of the total area upstream each gauging station with more than 10 years of continuous data (5338 catchments). Description of flow signatures and physiographic characteristics are found in Table 4-5 and metrics used for model performance in Eq. 1-4.

## 5.6. Discussion

### 5.16.1 Potential for improvements

The results from evaluating model performance using several metrics, several thousand gauges and numerous flow signatures, gave clear indication on regions where the model most urgently needs improvements. A thorough analysis of spatial patterns would benefit from evaluation against independent data of spatial patterns of hydrological variables, for instance from Earth Observations. The In general, the WWH model has severe problems with dry regions and base flow conditions, especially where the flow is sporadic (e.g. red areas in Fig. 5). The flow generating processes in such areas are known to be se are difficult areas to model (Bloeschl et al., 2013). For instance, most model concepts, and also the WWH, have problems with the and they will need special analysis great plains of US (e.g. Mizukami et al., 2017; Newman et al., 2017), where the terrain is complex with prairie potholes, which are disconnected from the rivers, and precipitation comprise a major source of hydrologic model error (e.g. Clark and Slater, 2006). Poor model performance were also found for the tundra and deserts, but it should then be recognized that the parameters for these regions were

estimated using only four time-series for bare soils (Table 6); including more gauging stations would be a way to improve the model here. In large parts of Africa, however, model errors could be linked to the soil-runoff parameters and local calibration based on catchment similarities have already been found to improve the performance a lot in west Africa.

In the snow-dominated part of the globe, extensive hydropower regulation change the natural variability of river discharge (Déry et al., 2016; Arheimer et al., 2017) but the global databases miss out of all medium and small dams that may affect discharge along these river networks. A general problem with modelling river regulation is that reservoirs can have multi-purposes and must be examined individually to understand the regulation schemes applied. Such analyses have started and shown potential to improve the global model a lot as the poorest model results are often linked to river regulations. However, individual reservoir calibration will be very time-consuming, so instead, we suggest starting with improvements that can be undertaken relatively quickly and easily. These mainly focus on the overall water balance.

Firstly, the global water balance can be improved through re-calibration but some basic concepts need to be adjusted accordingly: (i) more careful analyses indicate that the choice of climate regions based on Köppens classification for applying the different PET algorithms was not optimal and needs some adjustments, (ii) linking the centroid of the catchments to the nearest precipitation grid seems to remove a lot of the spatial variation and instead an average of nearest grids should be tried. Secondly, the HRUs can be recalibrated and reconsidered, and we suggest (i) testing a calibration scheme based on regionalized parameters rather than global, using clustering based on physiographic similarities (e.g. Hundecha et al., 2016), (ii) including soil properties in the HRU concept again (as in the original version of HYPE, see Lindström et al., 2010) to account for spatial variability in soil-water discharge linked to porosity in addition to vegetation and elevation. Thirdly, the behavior of hydrological features, such as lakes, reservoirs, glaciers, and floodplains can be evaluated and calibrated separately, after categorizing them more carefully or from individual tuning. Finally, more observations can be included, both in-situ by adding more gauges to the system and from global Earth Observation products, for instance on water levels and storage. Hence, each step in Fig. 3 still has potential for model improvements.

The stepwise parameter-estimation approach should ideally be cycled a couple of times to find robust values under new fixed parameter conditions. However, as the model was carefully evaluated during the calibration, there were a lot of bug fixing, corrections and additional improvements resulting between the steps and time was rather spent on this than on several full-filled iterations. Therefore, the stepwise calibration was subjected to several re-takes and shifts between steps until it ~~successfully- eventually~~ could full-fill all the calibration steps in one entire sequence (Fig. 8). Hence, only one loop was done for parameter estimations in this study. The procedure was judged as very useful for the model to be potentially right for the right reason, but also very time-consuming. However, applying a catchment modeler's approach, this is inevitable for reliably integrated catchment modelling and both the step-wise calibration and iterative model corrections will continue with new model versions.



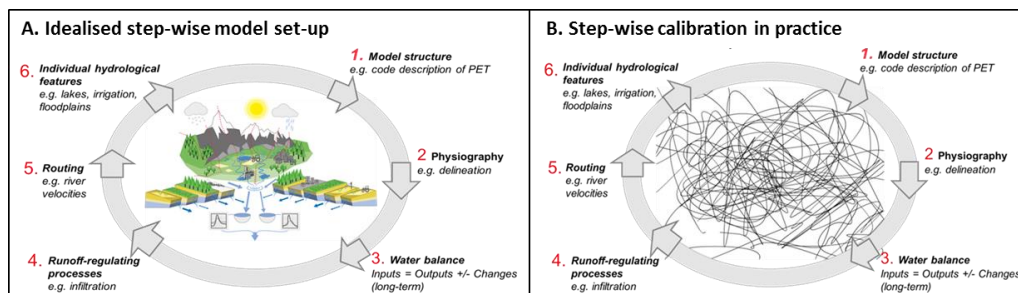

**Figure 8.** Discrepancy between the idealised procedure for step-wise calibration (A) and the numerous iterations between the steps that appear in reality (B), leading to overall model corrections.

Another important next step in model evaluation and improvement would be to initiate a concerted model inter-comparison study at the global scale with benchmarking (e.g. Newman et al., 2017), as we currently lack such studies for global hydrological models. Focus should then be on comparing model performance in general but also on input data and performance of specific hydrological processes to understand differences between various model concepts. The latter could be done by using the representative gauged basin approach, as in this study, to evaluate model performance for sites where flow is dominated by certain processes, or by analyzing specific parts of the hydrograph or flow signatures that represents time periods when specific processes dominate the flow generation. In addition to river gauges, other data sources should be used for model evaluation of spatial patterns, e.g. earth observations. Specific areas that are intensively managed and impacted by humans should also be distinguished and evaluated separately to better understanding process variability vs human impacts. Various sources of input data (from which errors may propagate) should also be evaluated to improve global hydrological modelling.

Formaterat: Normal

Formaterat: Engelska (USA)

Formaterat: Teckensnitt: Fet, Teckenfärg: Röd

## 5.26.2 Model usefulness

Catchment models are often applied by water managers and the usefulness is part of the concept. The analysis of WWH model performance shows that also this first version can to some extent be useful for water managers in several regions globally. For instance, long-term averages are rather reliable in Eastern USA, Europe, South-East Asia, Japan as well as most of Russia, Canada, and South America. Here the model could thus be used for e.g. analyzing shifts in water resources between different climate periods. For high flows, monthly values show good performance as well as the spatial pattern of relative values. This implies that the model could already be used for seasonal forecasting of recharge to hydropower reservoirs, for which these variables are often used. Accordingly, the model has been applied for producing water-related climate impact indicators and it is set-up operationally to provide monthly river-flow forecasts for 6 months ahead (<http://hypeweb.smhi.se/>).

Ändrad fältkod

In many areas, HYPE should still be considered as a scientific tool and cannot be used locally by water managers because of poor performance. However, the model provides a first platform for catchment modelling to be further refined and experimented with at the global, regional and local

scales. Parts of the model can be extracted (e.g. specific catchments or countries) and used as infrastructure, when starting the time-consuming process of setting up a catchment model. The model can then be improved for the selected catchments by exchanging the global input data with local data and knowledge, as well as parameters estimated to fit with local observations. Significant improvements in model performance from such a procedure have already been noted for West Africa (Andersson et al., 2017). In Sweden the operational HYPE model runs with national data and adjusted parameter values, providing an average daily NSE (Nash and Sutcliffe, 1970) of 0.83 for 222 stations with  $\leq 5\%$  regulation and an average relative volume error of  $\pm 5\%$  for the period 1999–2008. For all gauging sites (some 400) with both regulated and unregulated rivers, the mean monthly NSE is 0.80. The Swedish HYPE model has been improved incrementally during more than 10 years and has proven very useful in providing decision-support to society. It supports a national warning service with operational forecasting of floods and droughts (e.g. Pechlivanidis et al., 2014), and the water framework directive for measure plans to improve water quality (e.g. Arheimer and Pers, 2017; Arheimer et al., 2015). Moreover, it has been used in assessments of hydro-morphological impact (e.g. Arheimer and Lindström, 2014), climate-change impact analysis (e.g. Arheimer and Lindström, 2015) and combined effects from multiple-drivers on water resources in a changing environment (e.g. Arheimer et al., 2017; Arheimer et al., 2018).

Thus, it is found very useful to have a national multi-catchment model to support society in water related issues. This should be encouraging for other countries who do not yet have a national model set-up and also for international river basin authorities searching for a more harmonized way to predict river flow across administrative borders. Using the WWH as a starting point would be a quick and low-cost alternative for getting started with more detailed catchment modelling for decision-support in water management. Parts of the model are therefore shared and can be requested at <http://hypecode.smhi.se/>. Using a common framework for catchment modelling by many research groups and practitioners will probably advance science as it enables a critical mass and better communication when sharing experiences. Only when using the same methods or data, there is full transparency in the research process so that scientific progress and failures can be clearly understood, shared and learnt from. The WWH could be one stepping stone in such a collaborative process between catchment modellers across the globe.

Ändrad fältkod

## 6.7. Conclusions

The catchment modelling approach applied (using the HYPE model, open global data and recent calibration techniques) resulted in better performance (median monthly KGE = 0.4) than what has been reported so far from more traditional gridded modelling of river flow at the global scale. Major variability in hydrological processes could be recognized world-wide using global parameters, as these were linked to physiographical variables to describe spatial variability and calibrated in a step-wise manner. Clearly, the community of catchment modellers can contribute to research also at the global scale nowadays with the numerous open data available and advanced processing facilities.

771 However, the WWH resulting from this first model version should be used with caution (especially in  
772 dry regions) as the performance may still be of low quality for local or regional applications in water  
773 management. Geographically, the model performs best in Eastern USA, Europe, South-East Asia and  
774 Japan, as well as parts of Russia, Canada, and South America. The model shows overall good  
775 potential to capture flow signatures of monthly high flows, spatial variability of high flows, duration  
776 of low flows and constancy of daily flow. Nevertheless, there remains large potential for model  
777 improvements and it is suggested both to redo the calibration and reconsider parts of the model  
778 structure for the next WWH version.

779 The step-wise calibration procedure was judged as very useful for the model to be potentially right  
780 for the right reason, but also very time-consuming. The calibration cycle is suggested to be repeated  
781 a couple of times to find robust values under new fixed parameter conditions, which is a long-term  
782 commitment of continuous model refinement. The model set-up will be released in new model  
783 versions during this incremental improvement. For the next version, special focus will be given to the  
784 water balance (i.e. precipitation and evapotranspiration), soil storage and dynamics from  
785 hydrological features, such as lakes, reservoirs, glaciers and floodplains.

786 The model will be shared by providing a piece of the world to modellers working at the regional scale  
787 to appreciate local knowledge, establish a critical mass of experts from different parts of the world  
788 and improve the model in a collaborative manner. The model can serve as a fast track to a model  
789 environment for users who do not have this ready at hands and in return the WWH can be improved  
790 from feedback on hydrological processes from local experts across the world. Potentially it will  
791 accelerate scientific advancement if more researchers start using the same tools and data, which  
792 makes it easier to be transparent when evaluating and comparing scientific results.

793

## 794 **Code availability**

795 Hypecode.smhi.se

## 796 **Data availability**

797 Hypeweb.smhi.se

798

## 799 **Appendices**

800

801 The Table below show additional information to Table A1 regarding which HYPE parameters that  
802 were calibrated for each process during the model set-up and the range of resulting parameter  
803 values. Description of each parameter can be found in the HYPE wiki at <http://hypeweb.smhi.se/>.

804

Ändrad fältkod

805 **Table A1.** Metrics and parameter values from the stepwise parameter-estimation globally. Parameter names  
806 and values are given in the same order of appearance (columns 2 and 6).

| Hydrological Process                                                                                    | HYPE parameters<br><a href="http://hypecode.smhi.se/">http://hypecode.smhi.se/</a>                                                                                          | No.<br>gauges | Median value of<br>metric(s) |               | Parameter<br>value(s)                                                                                                                                                                                                        |
|---------------------------------------------------------------------------------------------------------|-----------------------------------------------------------------------------------------------------------------------------------------------------------------------------|---------------|------------------------------|---------------|------------------------------------------------------------------------------------------------------------------------------------------------------------------------------------------------------------------------------|
|                                                                                                         |                                                                                                                                                                             |               | Before                       | After         |                                                                                                                                                                                                                              |
| Potential Evapo-<br>Transpiration (3 PET-<br>algorithms: median of<br>ranges constrained with<br>MODIS) | Jhtadd,<br>jhtscale,<br>kc2,<br>kc3,<br>kc4,<br>krs,<br>alb,<br>alfapt                                                                                                      | 0             | RE: 11.5 %                   | RE:<br>0.5%   | 5;<br>100;<br>[0.7-1.7];<br>[0.15-1.7];<br>[0.8-1.6];<br>0.16;<br>[0.3-0.8];<br>1.26                                                                                                                                         |
| Glaciers (only evaluated<br>vs mass balance data)                                                       | glacvexp, glacvcoef, glacvexp1,<br>glacvcoef, glac2arlim,<br>glacannmb, glacttmp, glaccmlt,<br>glaccmrad, glaccmrefr, glacialb,<br>fepotglac                                | 296           | RE: 0.38%<br>CC: 0.51        | -             | 1.38, 0.17<br>1.25, 12.88<br>25 000 000, 0,<br>0, 1.58, 0.19,<br>0.06, 0.35, 0                                                                                                                                               |
| Soils (average, rock,<br>urban, water, rice)                                                            | 5 soils: rrcs1, rrcs2, rrcs3, trrcs,<br>mperc1, mperc2, macerate,<br>mactrinf, mactrsm, srrate,<br>wcwp, wcfc, wcep                                                         | 25            | RE: -14.1%<br>KGE: 0.2       |               | Ranges:<br>[0.20 - 0.5];<br>[0.01 - 0.45];<br>[0.01 - 0.1];<br>[0.05 - 0.35];<br>[30 - 100];<br>[10 - 60];<br>[0.05 - 0.7];<br>[12 - 30];<br>[0.3 - 0.9];<br>[0.01 - 0.3];<br>[0.01 - 0.6];<br>[0.2 - 0.6] ;<br>[0.01 - 0.5] |
| Bare soils in deserts<br>(calibrated manually)                                                          | rrcs1, rrcs2, rrcs3, trrcs, mperc1<br>mperc2, wcwp1, macerate,<br>mactrinf, mactrsm, sfrost,<br>srrate, wcwp1, wcwp2, wcwp3,<br>wcfc1, wcfc2, wcfc3, wcep1,<br>wcep2, wcep3 | 4             | RE: 236.1%                   | RE: -<br>18.9 | 0.6, 0.3, 0.0002,<br>0.15, 10, 0.1,<br>10, 0.8, 1, 0.01,<br>0.01, 0.0001,<br>0.0001, 0.3, 0.3,<br>0.0001, 0.03,<br>0.03, 0.0003                                                                                              |
| 1. Precipitation:<br>catchment elevation                                                                | Pcelevth, Pcelevadd, Pcelevmax                                                                                                                                              | 147           | RE: -6.7%                    | RE:<br>4.4%   | 500;<br>0.01;<br>0.7                                                                                                                                                                                                         |
| 2. Precipitation: land-<br>cover altitude                                                               | 5 elevation zones: pcluse                                                                                                                                                   | 1041          | RE: 24.3%                    | RE:<br>10.1%  | 0.05;<br>0.2;<br>0.25;<br>0.25;<br>0.35                                                                                                                                                                                      |
| 3. HRUs in areas without<br>snow                                                                        | 10 HRUs: kc2, kc3, kc4, alb,<br>soilcorr, srrcs, soilcorr                                                                                                                   | 318           | KGE: 0.16                    | KGE:<br>0.27  | Range:<br>[0.90-1.54];<br>[0.40-1.77];<br>[0.20-1.90];<br>[0.20-0.80];<br>[1.00-10.55];<br>[0.03-0.50];                                                                                                                      |

Ändrad fältkod

|                                                                 |                                                                    |     |            |            |                                                                         |
|-----------------------------------------------------------------|--------------------------------------------------------------------|-----|------------|------------|-------------------------------------------------------------------------|
| 4. HRUs in areas with snow: ET, recession and active soil depth | 10 HRUs: ttmp, cmlt, cmrad, fscdist0, fepotsnow                    | 225 | KGE: 0.16  | KGE: 0.24  | Ranges: [-2.67-1.80]; [1.10-4.00]; [0.16-1.5]; [0.20-0.75]; [0.09-0.98] |
| 5. Upstream lakes                                               | llratk, ilratp                                                     | 731 | CC: 0.71   | CC: 0.72   | 1.8; 1.4 (depth: 5 m; icatch: 0.3)                                      |
| 6. Regionalised ET (in 12 Köppen climate regions)               | 12 climates: cevpcorr                                              | 458 | KGE: 0.58  | KGE: 0.62  | Ranges: [-0.43 – 0.38]                                                  |
| 7. River routing                                                | rivvel, damp                                                       | 302 | CC: 0.70   | CC: 0.71   | 0.6; 1.0                                                                |
| 8. Lake rating curve                                            | 888 Lakes: rate; exp (LakeData.txt)                                | 945 | CC: 0.50   | CC: 0.59   | Ranges: [0.001– 1013]; [1.002 – 3.0];                                   |
| 9. Floodplains (partly calibrated manually)                     | 13 Floodplains: rclfp; rclpl; rcrfp; rcfpr (FloodData.txt)         | 32  | KGE: -0.03 | KGE: 0.03  | Ranges: [0.05 – 0.99]; [0.15 – 0.90]; [0.05 – 0.99]; [0.15 – 0.90]      |
| 10. Evaporation from water surface                              | kc2 <sub>water</sub> , kc3 <sub>water</sub> , kc4 <sub>water</sub> | 201 | RE: -20.7% | RE: -12.2% | 1.36; 0.65; 1.25                                                        |
| 11. Specific lake evaporation                                   | 2 regions: cevpcorr                                                | 16  | RE: 24.8%  | RE: 4.8%   | Ranges: [0.375-0.5]                                                     |

## Acknowledgements

We would like to thank all data providers listed in Table 1-3 who make their results and observations readily available for re-purposing; without you any global hydrological modelling would not be possible at all. Especially we would like to express our gratitude to Dr. Dai Yamazaki, University of Tokyo, for developing and sharing the global width database for large rivers, which we found very useful. The WWH was developed at the SMHI Hydrological Research unit, where much work is done in common taking advantages from previous work and several projects running in parallel in the group. It was indeed a team work. We would especially like to acknowledge contributions from our colleagues Jörgen Rosberg, Lotta Pers, David Gustafsson and Peter Berg, who provided much of the model infrastructure. Time-series and maps from the World-Wide HYPE model are available for free downloading at <http://hypeweb.smhi.se/> and documentation and open source code of the HYPE model is available at <http://hypecode.smhi.se/>.

Ändrad fältkod

Ändrad fältkod

## References

Abbaspour, K.C., Rouholahnejad, E., Vaghefi, S., Srinivasan, R., Yang, H., Kløve, B.: A continental-scale hydrology and water quality model for Europe: Calibration and uncertainty of a high-resolution large-scale swat model. J. Hydrol. 524:733–752, 2015.

829 Alfieri, L., Burek, P., Dutra, E., Krzeminski, B., Muraro, D., Thielen, J., and Pappenberger, F.: GloFAS –  
830 global ensemble streamflow forecasting and flood early warning, *Hydrol. Earth Syst. Sci.*, 17, 1161-  
831 1175, <https://doi.org/10.5194/hess-17-1161-2013>, 2013.

832 Andersson J.C.M., Arheimer B., Traoré F., Gustafsson D., Ali A.: Process refinements improve a  
833 hydrological model concept applied to the Niger River basin. *Hydrological Processes* pp.1-15.  
834 <https://doi.org/10.1002/hyp.11376>, 2017.

835 Archfield, S.A., Clark, M., Arheimer, B., Hay, L.E., McMillan, H., Kiang, J.E., Seibert, J., Hakala, K., et  
836 al.: Accelerating advances in continental domain hydrologic modelling. *Water Resources Research*  
837 51(12):10078–10091. doi:10.1002/2015WR017498, 2015.

838 Arheimer, B. and Brandt, M.: Modelling nitrogen transport and retention in the catchments of  
839 southern Sweden. *Ambio* 27(6):471-480. 1998.

840 Arheimer, B., Dahné, J., Donnelly, C., Lindström, G. and Strömqvist, J.: Water and nutrient simulations  
841 using the HYPE model for Sweden vs. the Baltic Sea basin – influence of input-data quality and scale.  
842 *Hydrology research* 43(4):315-329. DOI: 10.2166/nh.2012.010, 2012.

843 Arheimer, B., Donnelly, C. and Lindström, G.: Regulation of snow-fed rivers affects flow regimes more  
844 than climate change. *Nature Communications* 8(62). doi:10.1038/s41467-017-00092-8, 2017.

845 Arheimer, B., Hjerdt, N. and Lindström, G.: Artificially induced floods to manage forest habitats under  
846 climate change. *Front. Environ. Sci.* 6:102. doi: 10.3389/fenvs.2018.00102, 2018.

847 Arheimer, B. and Lindström, L.: Implementing the EU Water Framework Directive in Sweden. Chapter  
848 11.20 in: Bloeschl, G., Sivapalan, M., Wagener, T., Viglione, A. and Savenije, H. (Eds). *Runoff*  
849 *Predictions in Ungauged Basins – Synthesis across Processes, Places and Scales*. Cambridge University  
850 Press, Cambridge, UK. (p. 465) pp. 353-359, 2013.

851 Arheimer, B. and Lindström, G.: Electricity vs Ecosystems – understanding and predicting hydropower  
852 impact on Swedish river flow. *Evolving Water Resources Systems: Understanding, Predicting and*  
853 *Managing Water–Society Interactions*. Proceedings of ICWRS2014, Bologna, Italy, June 2014; IAHS  
854 Publ. 364:313-319, 2014.

855 Arheimer, B. and Lindström, G.: Climate impact on floods: changes in high flows in Sweden in the  
856 past and the future (1911–2100), *Hydrol. Earth Syst. Sci.*, 19:771-784, doi:10.5194/hess-19-771-2015,  
857 2015.

858 Arheimer, B., Lindström, G. and Olsson, J.: A systematic review of sensitivities in the Swedish flood-  
859 forecasting system. *Atmospheric Research* 100:275–284, 2011.

860 Arheimer, B., Nilsson, J. and Lindström, G.: Experimenting with Coupled Hydro-Ecological Models to  
861 Explore Measure Plans and Water Quality Goals in a Semi-Enclosed Swedish Bay. *Water* 7(7):3906-  
862 3924. doi:10.3390/w7073906, 2015.

863 Arheimer, B. and Pers B.C.: Lessons learned? Effects of nutrient reductions from constructing  
864 wetlands in 1996–2006 across Sweden. *Ecological Engineering*, Volume 103, Part B, June 2017, Pages  
865 404–414. doi:10.1016/j.ecoleng.2016.01.088, 2017.

Ändrad fältkod

866 Arendt et al., Randolph Glacier Inventory (RGI) – A Dataset of Global Glacier Outlines: Version 5.0,  
867 GLIMS Technical Report, 2015.

868 Arnell, N.W.: The Effect of Climate Change on Hydrological Regimes in Europe A Continental  
869 Perspective. *Global Environmental Change*, 9, 5-23, 1999.

872 Beck, H. E., van Dijk, A. I. J. M., deRoo, A., Miralles, D. G., McVicar, T. R., Schellekens, J. and  
873 Bruijnzeel, L. A.: Global-scale regionalization of hydrologic model parameters, *WaterResour. Res.*, 52,  
874 3599–3622, doi:10.1002/2015WR018247, 2016.

875 Beck, H. E., van Dijk, A. I. J. M., Levizzani, V., Schellekens, J., Miralles, D. G., Martens, B., and de Roo,  
876 A.: MSWEP: 3-hourly 0.25° global gridded precipitation (1979–2015) by merging gauge, satellite, and  
877 reanalysis data, *Hydrol. Earth Syst. Sci.*, 21, 589-615, <https://doi.org/10.5194/hess-21-589-2017>,  
878 2017.

879 Berg, P., Donnelly, C., and Gustafsson, D.: Near-real-time adjusted reanalysis forcing data for  
880 hydrology, *Hydrol. Earth Syst. Sci.*, 22, 989-1000, <https://doi.org/10.5194/hess-22-989-2018>, 2018.

881 Berghuijs, W.R, Woods, R.A. and Hrachowitz, M.: A precipitation shift from snow towards rain leads  
882 to a decrease in streamflow. *Nat. Clim. Change* 4 (7), 583-586, 2014.

883 Bergström, S. and Forsman, A. : Development of a conceptual deterministic rainfall-runoff model.  
884 *Nordic Hydrol.* 4, 147–170, 1973.

885 Beven, K. J. and Kirkby, M. J.: A physically-based variable contributing area model of basin hydrology.  
886 *Hydrol. Sci. Bull.* 24(1), 43–69, 1979.

887 Beven K.J. and Binley A.M.: The future of distributed models: model calibration and uncertainty  
888 prediction. *Hydrological Processes* 6: 279–298. 1992.

889 Bloeschl, G., Sivapalan, M., Wagener, T., Viglione, A. and Savenije, H. (Eds). *Runoff Predictions in*  
890 *Ungauged Basins – Synthesis across Processes, Places and Scales*. Cambridge University Press,  
891 Cambridge, UK. (p. 465), 2013.

892 Boyer, J.F., Dieulin, C., Rouche, C., Rouche, N., Cres, A., Servat, E., Paturel, J. E., and Mahé, G.:  
893 SIEREM: an environmental information system for water resources. *Climate Variability and Change—*  
894 *Hydrological Impacts*, Proceedings of the Fifth FRIEND World Conference held at Havana, Cuba, IAHS  
895 Publ. 308, 19-25., 2006.

896 Bodo, B.: Russian River Flow Data by Bodo, Research Data Archive at the National Center for  
897 Atmospheric Research, Computational and Information Systems Laboratory, Boulder CO. [online]  
898 Available from: <http://rda.ucar.edu/datasets/ds553.1/> (Accessed 28 January 2019), 2000.

899 Choulga, M., Kourzeneva, E., Zakharova, E., and Doganovsky, A.: Estimation of the mean depth of  
900 boreal lakes for use in numerical weather prediction and climate modelling. *Tellus A: Dynamic*  
901 *Meteorology and Oceanography*, 66(1), 21295, doi: 10.3402/tellusa.v66.21295, 2014.

902 Clark, M.P. and A.G. Slater: Probabilistic Quantitative Precipitation Estimation in Complex Terrain. *J.*  
903 *Hydrometeor.*, 7, 3–22, <https://doi.org/10.1175/JHM474.1>, 2006.

Colwell, R. K.: Predictability, Constancy, and Contingency of Periodic Phenomena, Ecology, 55, 1148–1153, 1974.

Crochemore, L., Isberg, K., Pimentel, R., Pineda, L., Hasan, A. and Arheimer, B.: Lessons learnt from checking the quality of openly accessible river flow data worldwide. ~~Submitted to~~ Hydrological Sciences Journal special issue on “Hydrological Data: Opportunities and Barriers” ~~31~~ <https://doi.org/10.1080/02626667.2019.1659509>, 2019.

Dee, D. P., Uppala, S. M., Simmons, A. J., Berrisford, P., Poli, P., Kobayashi, S., Andrae, U., et al.: The ERA-Interim reanalysis: configuration and performance of the data assimilation system, Q. J. Roy. Meteorol. Soc., 137, 553–597, <https://doi.org/10.1002/qj.828>, 2011.

~~Déry, S. J., Stadnyk, T. A., MacDonald, M. K., and Gauli-Sharma, B.: Recent trends and variability in river discharge across northern Canada, Hydrol. Earth Syst. Sci., 20, 4801-4818, <https://doi.org/10.5194/hess-20-4801-2016>, 2016.~~

Döll, P., Kaspar, F. and Lehner, B.: A global hydrological model for deriving water availability indicators: model testing and validation. J. Hydrol. 270, 105–134, 2003.

Donnelly, C, Andersson, J.C.M. and Arheimer, B.: Using flow signatures and catchment similarities to evaluate a multi-basin model (E-HYPE) across Europe. Hydr. Sciences Journal 61(2):255-273, doi: 10.1080/02626667.2015.1027710, 2016.

Donnelly, C., Arheimer, B., Capell, R., Dahné, J., and Strömquist, J.: Regional overview of nutrient load in Europe – challenges when using a large-scale model approach, E-HYPE. IAHS Publ. 361:49-58, 2013.

Donnelly, C., Greuell, W., Andersson, J. et al.: Impacts of climate change on European hydrology at 1.5, 2 and 3 degrees mean global warming above preindustrial level. Climatic Change Vol.143: 13-26. <https://doi.org/10.1007/s10584-017-1971-7>, 2017.

Falkenmark, M. and Chapman, T. Eds. : Comparative Hydrology: An Ecological Approach to Land and Water Resources. UNESCO, Paris, 1989.

Fernandez, W., Vogel, R. M. and Sankarasubramanian, A.: Regional calibration of a watershed model. Hydrol. Sci. J. 45(5), 689–707. DOI:10.1080/0262666009492371, 2000.

Ford W.: Zeitschrift für Geomorphologie Suppl-Vol 147 :1-2. 2006.

Gao, H., Hrachowitz, M., Schymanski, S.J., Fenicia, F., Sriwongsitanon, N., and Savenije, H.H.G.: Climate controls how ecosystems size the root zone storage capacity at catchment scale, Geophysical Research Letters, 41, 7916-7923, doi: 10.1002/2014GL061668, 2014.

Gelfan, A., Gustafsson, D., Motovilov, Y., Arheimer, B., Kalugin, A., Krylenko, I. and Lavrenov, A.: Climate change impact on the water regime of two great Arctic rivers: modeling and uncertainty issues. Climatic Change 141(3):499–515. DOI: 10.1007/s10584-016-1710-5m, 2017.

Gosling, S. N., Zaherpour, J., Mount, N., Hattermann, F. F., Dankers, R., Arheimer, B., Breuer, L., Ding, J., et al.: A comparison of changes in river runoff from multiple global and catchment-scale

Ändrad fältkod

Formaterat: Engelska (USA)

Ändrad fältkod

Ändrad fältkod



hydrological models under global warming scenarios of 1°C, 2°C and 3°C, *Climatic Change* 141(3):577–595. doi: 10.1007/s10584-016-1773-3, 2017

Gupta, H. V., Kling, H., Yilmaz, K. K., and Martinez, G. F.: Decomposition of the mean squared error and NSE performance criteria: Implications for improving hydrological modelling, *J Hydrology*, 377 (1–2), 80–91, <https://doi.org/10.1016/j.jhydrol.2009.08.003>, 2009.

Gupta, H. V., Perrin, C., Blöschl, G., Montanari, A., Kumar, R., Clark, M., and Andréassian, V.: Large-sample hydrology: a need to balance depth with breadth, *Hydrol. Earth Syst. Sci.*, 18, 463–477, <https://doi.org/10.5194/hess-18-463-2014>, 2014.

Hargreaves, G.H. and Samani, Z.A.: Estimating potential evapotranspiration. Technical note. *Journal of Irrigation and Drainage Engineering* 108 (3), 225–230, 1982.

Harris, I. and Jones, P.: CRU TS3.22: Climatic Research Unit (CRU) Time-Series (TS) Version 3.22 of High Resolution Gridded Data of Month-by-month Variation in Climate (Jan. 1901–Dec. 2013), NCAS British Atmospheric Data Centre, 24 September 2014, <https://doi.org/10.5285/18BE23F8-D252-482D-8AF9-5D6A2D40990C>, 2014.

Henck, A., Huntington, K., Stone, J. O., Montgomery, D. R., and Hallet, B.: Spatial controls on erosion in the Three Rivers region, western China, *Earth and Planetary Science Letters*, v. 303, p. 71–83, doi:10.1016/j.epsl.2010.12.038, 2011.

Howat, I.M., Negrete, A. and Smith, B.E.: The Greenland Ice Mapping Project (GIMP) land classification and surface elevation datasets, *The Cryosphere*, 8, 1509–1518, doi:10.5194/tc-8-1509-2014, 2014.

Hrachowitz, M., Savenije, H.H.G., Blöschl, G., McDonnell, J.J., Sivapalan, M., Pomeroy, J.W., Arheimer, B., Blume, T., et al.: A decade of Predictions in Ungauged Basins (PUB) - a review. *Hydrological Sciences Journal*, 58(6):1198–1255, DOI:10.1080/02626667.2013.803183, 2013

Hundecha, Y., and Bárdossy, A.: Modeling of the effect of land use changes on the runoff generation of a river basin through parameter regionalization of a watershed model, *J. Hydrol.*, 292, 281–295. 2004.

Hundecha, Y., Arheimer, B., Donnelly, C., Pechlivanidis, I.: A regional parameter estimation scheme for a pan-European multi-basin model. *Journal of Hydrology: Regional Studies*, Volume 6, June 2016, Pages 90–111. doi:10.1016/j.ejrh.2016.04.002, 2016.

Iliopoulou, T., Aguilar, C., Arheimer, B., Bermúdez, M., Bezak, N., Ficchi, A., Koutsoyiannis, D., Parajka, J., Polo, M. J., Thirel, G., and Montanari, A.: A large sample analysis of European rivers on seasonal river flow correlation and its physical drivers, *Hydrol. Earth Syst. Sci.*, 23, 73–91, <https://doi.org/10.5194/hess-23-73-2019>, 2019.

Jensen, M.E. and Haise, H.R.: Estimating evapotranspiration from solar radiation. *Journal of Irrigation and Drainage Division, ASCE* 89 (LR4), 15–41, 1963.

Kottek, M., Grieser, J., Beck, C., Rudolf, B. and Rubel, F.: World Map of the Köppen-Geiger climate classification updated. *Meteorol. Z.*, 15, 259–263. DOI: 10.1127/0941-2948/2006/0130, 2006.

Ändrad fältkod

979 Kourzeneva, E.: External data for lake parameterization in Numerical Weather Prediction and climate  
980 modeling. *Boreal Environmental Research*, 15, 165-177, 2010.

981 Kuentz, A., Arheimer, B., Hundecha, Y., and Wagener, T.: Understanding hydrologic variability across  
982 Europe through catchment classification, *Hydrol. Earth Syst. Sci.*, 21, 2863-2879,  
983 <https://doi.org/10.5194/hess-21-2863-2017>, 2017.

984 Laloy, E., and J. A. Vrugt: High-dimensional posterior exploration of hydrologic models using multiple-  
985 try DREAM(ZS) and high-performance computing, *Water Resour. Res.*, 48, W01526,  
986 doi:10.1029/2011WR010608, 2012

987 Lawrence D. M., Oleson K. W., Flanner M. G., Thornton P. E., Swenson S. C., Lawrence P. J., et al.:  
988 Parameterization improvements and functional and structural advances in version 4 of the  
989 community land model. *J. Adv. Model. Earth Syst.*, Vol. 3, Art. 2011MS000045, 27 pp., 2011.

990 Lehner, B. and Döll, P.: Development and validation of a global database of lakes, reservoirs and  
991 wetlands, *Journal of Hydrology*, 296(1-4), 1-22, doi: 10.1016/j.jhydrol.2004.03.028, 2004.

992 Lehner, B., Liermann, C.R., Revenga, C., Vörösmarty, C., Fekete, B., Crouzet, P., Döll, P., Endejan, M.,  
993 et al.: High-resolution mapping of the world's reservoirs and dams for sustainable river-flow  
994 management. *Front. Ecol. Environ.* 9, 494-502. doi:10.1890/100125, 2011.

995 Liang, X., Lettenmaier, D. P., Wood, E. F. and Burges, S. J.: A simple hydrologically based model of  
996 land surface water and energy fluxes for general circulation models, *J. Geophys. Res.*, 99(D7), 14415-  
997 14428, doi:10.1029/94JD00483, 1994.

998 Lindström, G., Johansson, B., Persson, M., Gardelin, M. and Bergström, S.: Development and test of  
999 the distributed HBV-96 model. *J. Hydrol.* 201, 272-288, 1997.

1000 Lindström, G., Pers, C.P., Rosberg, R., Strömqvist, J., and Arheimer, B.: Development and test of the  
1001 HYPE (Hydrological Predictions for the Environment) model – A water quality model for different  
1002 spatial scales. *Hydrology Research* 41.3-4:295-319, 2010.

1003 MacDonald, M. K., Stadnyk, T. A., Déry, S. J., Braun, M., Gustafsson, D., Isberg, K., and Arheimer, B.:  
1004 Impacts of 1.5 and 2.0 °C warming on pan-Arctic river discharge into the Hudson Bay Complex  
1005 through 2070. *Geophysical Research Letters*, 45, 7561-7570.  
1006 <https://doi.org/10.1029/2018GL079147>, 2018.

1007 [Mathevet, T., Michel, C., Andréassian, V., and Perrin, C.: A bounded version of the Nash-Sutcliffe](#)  
1008 [criterion for better model assessment on large sets of basins. \*IAHS Red Books Series n°307\*, pp. 211-](#)  
1009 [219, 2006](#)

1010 Merz, R. and Blöschl, G.: Regionalisation of catchment model parameters, *J. Hydrol.*, 287, 95-123,  
1011 doi:10.1016/j.jhydrol.2003.09.028, 2004.

1012 Milliman, J. D. and Farnsworth, K. L.: *River Discharge to the Coastal Ocean: A Global Synthesis*  
1013 Cambridge Univ. Press, 2011.

1014 [Mizukami, N., Clark, M. P., Newman, A. J., Wood, A. W., Gutmann, E. D., Nijssen, B., Rakovec, O.,](#)  
1015 [and Samaniego, L.: Towards seamless large-domain parameter estimation for hydrologic models,](#)  
1016 [Water Resour. Res., 53, 8020- 8040, doi:10.1002/2017WR020401, 2017.](#)

Ändrad fältkod

Formaterat: Engelska (USA)

1017 [Mizukami, N., Rakovec, O., Newman, A. J., Clark, M. P., Wood, A. W., Gupta, H. V., and Kumar, R.: On](#)  
1018 [the choice of calibration metrics for “high-flow” estimation using hydrologic models, Hydrol. Earth](#)  
1019 [Syst. Sci., 23, 2601–2614, <https://doi.org/10.5194/hess-23-2601-2019>, 2019.](#)

1020 Mu, Q., Zhao, M., and Running, S.W.: Improvements to a MODIS global terrestrial evapotranspiration  
1021 algorithm, *Rem Sens of Environment*, 115 (8), 1781-1800. doi.org/10.1016/j.rse.2011.02.019, 2011.

1022 Montanari, A., Young, Savenije, G., H., Hughes, D., Wagener, T., Ren, L., Koutsoyiannis, D.,  
1023 Cudennec, C., et al.: “Panta Rhei – Everything Flows”: Change in hydrology and society – The IAHS  
1024 Scientific Decade 2013-2022. *Hydrological Sciences Journal*, 58(6):1256-1275,  
1025 doi:10.1080/02626667.2013.809088., 2013.

1026 [Déry, S. J., Stadnyk, T. A., MacDonald, M. K., and Gauli-Sharma, B.: Recent trends and variability in](#)  
1027 [river discharge across northern Canada, Hydrol. Earth Syst. Sci., 20, 4801-4818,](#)  
1028 <https://doi.org/10.5194/hess-20-4801-2016>, 2016.

1029 Nash, J. E. and Sutcliffe, J. V.: River flow forecasting through conceptual models part I — A discussion  
1030 of principles. *Journal of Hydrology*. 10 (3): 282–290. doi:10.1016/0022-1694(70)90255-6, 1970.

1031 [Newman, A.J., N. Mizukami, M.P. Clark, A.W. Wood, B. Nijssen, and G. Nearing: Benchmarking of a](#)  
1032 [Physically Based Hydrologic Model. J. Hydrometeor., 18, 2215–2225, \[https://doi.org/10.1175/JHM-D-\]\(https://doi.org/10.1175/JHM-D-16-0284.1\)](#)  
1033 [16-0284.1](https://doi.org/10.1175/JHM-D-16-0284.1), 2017.

1034 Olden, J. D. and Poff, N. L.: Redundancy and the choice of hydrologic indices for characterizing  
1035 streamflow regimes, *River Res. Applic.*, vol. 19, no. 2, pp. 101–121, 2003.

1036 Oudin, L., V. Andréassian, C. Perrin, C. Michel, and N. Le Moine: Spatial proximity, physical similarity  
1037 and ungauged catchments: confrontation on 913 French catchments, *Water Resour. Res.*, 44, W03413,  
1038 doi:03410.01029/02007WR006240, 2008.

1039 Pechlivanidis, I. G. and Arheimer, B.: Large-scale hydrological modelling by using modified PUB  
1040 recommendations: the India-HYPE case, *Hydrol. Earth Syst. Sci.*, 19, 4559-4579, doi:10.5194/hess-19-  
1041 4559-2015., 2015.

1042 Pechlivanidis, I.G., Bosshard, T., Spångmyr, H., Lindström, G., Gustafsson, D., and Arheimer, B.:  
1043 Uncertainty in the Swedish Operational Hydrological Forecasting Systems. ASCE proceedings:  
1044 Vulnerability, Uncertainty, and Risk. pp. 253-262. doi: 10.1061/9780784413609.026, 2014.

1045 Parajka, J., Bloeschl, G. and Merz, R.: Regional calibration of catchment models: Potential for  
1046 ungauged catchments, *Water Resour. Res.*, 43, W06406, doi:10.1029/2006WR005271, 2007.

1047 Pianosi, F., Sarrazin, F. and Wagener, T.: A Matlab toolbox for Global Sensitivity Analysis,  
1048 *Environmental Modelling & Software*, Volume 70, August 2015, Pages 80-85, 2015

1049 Pitman, A. J.: The evolution of, and revolution in, land surface schemes designed for climate models.  
1050 *Int. J. Climatol.*, 23: 479-510. doi:10.1002/joc.893, 2003.

1051 Portmann, F. T., Siebert, S. and Döll, P., 2010.: MIRCA2000 – Global monthly irrigated and rainfed  
1052 crop areas around the year 2000: A new high-resolution data set for agricultural and hydrological  
1053 modeling, *Global Bio. Cycles*, 24, GB 1011, 2010.

1054 Priestley, C.H.B. and Taylor, R.J.: On the assessment of surface heat fluxes and evaporation using  
1055 large-scale parameters. *Monthly Weather Review* 100, 81–92, 1972.

1056 Rastner, P., Bolch, T., Mölg, N., Machguth, H., Le Bris, R., and Paul, F.: The first complete inventory of  
1057 the local glaciers and ice caps on Greenland, *The Cryosphere*, 6, 1483-1495,  
1058 <https://doi.org/10.5194/tc-6-1483-2012>, 2012.

1059 Rice, J.S., Emanuel, R.E., Vose, J.M. and Nelson, S.A.C.: Continental U.S. streamflow trends from 1940  
1060 to 2009 and their relationships with watershed spatial characteristics. *Water Resources Research*.  
1061 DOI:10.1002/2014WR016367, 2015.

1064 Sawicz, K., Kelleher, C., Wagener, T., Sivapalan, M., Troch, P.A. and Carrillo, G.: Understanding  
1065 hydrologic change through catchment classification. *Hydrology and Earth System Sciences*, 18, 273–  
1066 285, 2014.

1067 Schneider, U., Becker, A., Finger, P., Meyer-Christoffer, A., Ziese, M., and Rudolf, B.: GPCC's new land  
1068 surface precipitation climatology based on quality-controlled in situ data and its role in quantifying  
1069 the global water cycle, *Theor. Appl. Climatol.*, 115, 15–40, 2014.

1070 Siebert, S., Henrich, V., Frenken, K. and Burke, J.: Global Map of Irrigation Areas version 5. Rheinische  
1071 Friedrich-Wilhelms-University, Bonn, Germany / Food and Agriculture Organization of the United  
1072 Nations, Rome, Italy, 2013.

1073 Siebert, S., Henrich, V., Frenken, K., and Burke, J.: Update of the Global Map of Irrigation Areas to  
1074 version 5. Technical report, 172p. DOI: 10.13140/2.1.2660.6728, 2013.

1075 Sivapalan, M.: Pattern, process and function: Elements of a unified theory of hydrology at the  
1076 catchment scale, in: *Encyclopedia of Hydrological Sciences*, edited by: Anderson, M., London, John  
1077 Wiley, 193–219, 2005.

1078 Strömqvist, J., Arheimer, B., Dahné, J., Donnelly, C. and Lindström, G.: Water and nutrient predictions  
1079 in ungauged basins – Set-up and evaluation of a model at the national scale. *Hydrological Sciences*  
1080 *Journal* 57(2):229-247. <https://doi.org/10.1080/02626667.2011.637497>, 2012.

1081 Ter Braak, C.J.F.: A Markov Chain Monte Carlo version of the genetic algorithm Differential Evolution:  
1082 easy Bayesian computing for real parameter spaces. *Stat. Comput.* 16: 239.  
1083 <https://doi.org/10.1007/s11222-006-8769-1>, 2006.

1084 Troch, P. A., Martinez, G. F., Pauwels, V. R., Durcik, M. , Sivapalan, M. , Harman, C. , Brooks, P. D.,  
1085 Gupta, H. and Huxman, T.: Climate and vegetation water use efficiency at catchment scales. *Hydrol.*  
1086 *Process.*, 23: 2409-2414. doi:10.1002/hyp.7358, 2009.

1087 Vörösmarty, C. J., Fekete, B. M. and Tucker, B. A.: Global River Discharge, 1807-1991, V[ersion]. 1.1  
1088 (RivDIS). ORNL DAAC, Oak Ridge, Tennessee, USA. <http://dx.doi.org/10.3334/ORNLDAAAC/199.1998>,  
1089 1998.

1090 Vörösmarty, C.J., Green, P., Salisbury, J., Lammers, R. B.: Global water resources: Vulnerability from  
1091 climate change and population growth. *Science*, 289(5477), pp. 284-288, 2000

Ändrad fältkod

1092 Weedon, G. P., Balsamo, G., Bellouin, N., Gomes, S., Best, M. J., and Viterbo, P.: The WFDEI  
1093 meteorological forcing data set: WATCH Forcing Data methodology applied to ERA-Interim reanalysis  
1094 data, *Water Resour. Res.*, 50, 7505–7514, 2014.

1095 Wood, E. F. et al. (1998), The Project for Intercomparison of Land-surface Parameterization Schemes  
1096 (PILPS) Phase 2(c) Red–Arkansas River basin experiment: 1. Experiment description and summary  
1097 intercomparisons, *Global Planet. Change*, 19(1–4), 115–135, doi:10.1016/S0921-8181(98)00044-7.

1100 Yamazaki, D., F. O’Loughlin, M. A. Trigg, Z. F. Miller, T. M. Pavelsky, and P. D. Bates: Development of  
1101 the Global Width Database for Large Rivers, *Water Resour. Res.*, 50, 3467–3480,  
1102 doi:10.1002/2013WR014664. 2014.

1105

1106
